# Supplementary material for: Is the growth of the child of a smoking mother influenced by the father's prenatal exposure to tobacco? A hypothesis generating longitudinal study
Source: PubMed Central journal article supplement (PMC4120379; doi:10.1136/bmjopen-2014-005030), 2014-07-11
Supplement: bmjopen-2014-005030.draft_revisions.pdf [file bmjopen-2014-005030.draft_revisions.pdf]

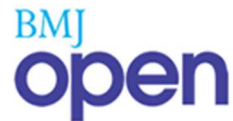

**Is the growth of the child of a smoking mother influenced  
by the  
father's prenatal exposure to tobacco? A hypothesis  
generating  
longitudinal study**

|                                    |                                                                                                                                                                                                                                                                                                                                                                                             |
|------------------------------------|---------------------------------------------------------------------------------------------------------------------------------------------------------------------------------------------------------------------------------------------------------------------------------------------------------------------------------------------------------------------------------------------|
| Journal:                           | <i>BMJ Open</i>                                                                                                                                                                                                                                                                                                                                                                             |
| Manuscript ID:                     | bmjopen-2014-005030                                                                                                                                                                                                                                                                                                                                                                         |
| Article Type:                      | Research                                                                                                                                                                                                                                                                                                                                                                                    |
| Date Submitted by the Author:      | 10-Feb-2014                                                                                                                                                                                                                                                                                                                                                                                 |
| Complete List of Authors:          | Pembrey, Marcus; University of Bristol, Social and Community Medicine<br>Northstone, Kate; University of Bristol, Centre for Child and Adolescent<br>Health<br>Gregory, Steven; University of Bristol, Social and Community Medicine<br>Miller, Laura; University of Bristol, Social and Community Medicine<br>Golding, Jean; University of Bristol, Centre for Child and Adolescent Health |
| <b>Primary Subject<br>Heading</b>: | Epidemiology                                                                                                                                                                                                                                                                                                                                                                                |
| Secondary Subject Heading:         | Public health                                                                                                                                                                                                                                                                                                                                                                               |
| Keywords:                          | Transgenerational effects, ALSPAC, grandmothers' prenatal smoking, birth<br>head circumference                                                                                                                                                                                                                                                                                              |
|                                    |                                                                                                                                                                                                                                                                                                                                                                                             |

SCHOLARONE™  
Manuscripts

only

1  
2  
3  
4  
5  
6  
7  
8  
9  
10  
11  
12  
13  
14  
15  
16  
17  
18  
19  
20  
21  
22  
23  
24  
25  
26  
27  
28  
29  
30  
31  
32  
33  
34  
35  
36  
37  
38  
39  
40  
41  
42  
43  
44  
45  
46  
47  
48  
49  
50  
51  
52  
53  
54  
55  
56  
57  
58  
59  
60

**Is the growth of the child of a smoking mother influenced by the father's prenatal exposure to tobacco? A hypothesis generating longitudinal study**

Marcus Pembrey<sup>abc</sup>, Kate Northstone<sup>a</sup>, Steven Gregory<sup>ab</sup>, Laura L Miller<sup>a</sup>,

Jean Golding<sup>ab</sup>

<sup>a</sup>School of Social and Community Medicine, <sup>b</sup>Centre for Child and Adolescent Health, University of Bristol, Bristol and <sup>c</sup>Institute of Child Health, University College London, London, UK

**Key Words:** ALSPAC, transgenerational effects, grandmothers' prenatal smoking, birth head circumference, IQ

**Correspondence to:**

Professor Jean Golding,  
Centre for Child and Adolescent Health,  
School of Social and Community Medicine,  
Barley House,  
Oakfield Grove  
Bristol BS8 2BN,  
UK

Email: [jean.golding@bristol.ac.uk](mailto:jean.golding@bristol.ac.uk)

Telephone: +44 (0)117 3310198

Fax: +44 (0)117 3313303

**5.2.14**

**Word Count: 3432**

## Abstract

*Objectives:* Transgenerational effects of different environmental exposures is becoming of major interest, with rodent experiments focusing on epigenetic mechanisms. Previously we have shown that if the study mother is a non-smoker, there is increased mean birth weight, length and body mass index [BMI] in her sons if she herself had been exposed prenatally to her mother's smoking. The aim of this study was to determine whether the prenatal smoke exposure of either parent influenced the growth of the fetus of a smoking woman, and whether any effects were dependent on the fetal sex.

*Design:* Population based pre-birth cohort study.

*Setting:* Avon Longitudinal Study of Parents and Children.

*Participants:* Participants were residents of a geographic area with expected date of delivery between April 1991 and December 1992. Among pregnancies of mothers who smoked during pregnancy, data were available concerning maternal and paternal prenatal exposures to their own mother smoking for 3502 and 2354 respectively

*Primary and secondary outcome measures:*, Birth weight, length, BMI and head circumference.

*Results:* After controlling for confounders, there were no associations with birth weight, length or BMI. There was a strong adjusted association of birth head circumference among boys whose fathers had been exposed prenatally [mean difference -0.35cm; 95%CI -0.57,-0.14; P=0.001]. There was no such association with girls (interaction: P=0.006). Similar associations were found when primiparae and multiparae were analysed separately. In order to determine whether this was reflected in child development, we examined the relationships with IQ; we found that the boys born to exposed fathers had lower IQ scores on average, and that this was particularly due to the verbal component [mean difference in verbal IQ: -3.65; 95%CI -6.60,-0.70 points].

1  
2  
3  
4  
5  
6  
7  
8  
9  
10  
11  
12  
13  
14  
15  
16  
17  
18  
19  
20  
21  
22  
23  
24  
25  
26  
27  
28  
29  
30  
31  
32  
33  
34  
35  
36  
37  
38  
39  
40  
41  
42  
43  
44  
45  
46  
47  
48  
49  
50  
51  
52  
53  
54  
55  
56  
57  
58  
59  
60

*Conclusions:* Head size differences concerning paternal fetal exposure to smoking were unexpected and, as such, should be regarded as hypothesis generating.

For peer review only

### Strengths and limitations of this study

- This study is the first to examine the sex-specific fetal effects of parental prenatal exposure to cigarette smoking when the mother herself smoked during pregnancy.
- Data were collected on a population sample who completed questionnaires blind to the study hypotheses.
- Birth measurements were undertaken using trained staff with repeated validation.
- A variety of sensitivity analyses were undertaken, including separate analyses of primiparae and multiparae, as well as of follow-up of the offspring to determine whether the decrement in birth head circumference was reflected in childhood measurement of IQ. All were in accord with the initial finding.
- The limitation of the study is the failure to obtain comparable data to confirm or negate the study findings.

## INTRODUCTION

Fetal programming via the mother's nutrition and other aspects of her environment is well-recognised as a contributor to adult morbidity and mortality[1] and some of these enduring effects are likely to be mediated by epigenetic mechanisms.[2,3] Studies have shown specific DNA methylation patterns in children whose mothers had smoked during pregnancy.[4-7] However, there have been few pre-conceptional transgenerational studies relating the fetal environment of either parent to the birth outcomes of their own children.

In an earlier study of non-smoking mothers, we found an increase in the birth weight and birth body mass index [BMI] of her sons if she had been exposed *in utero* to her own mothers' smoking, but there was no such effect if the study father had been exposed *in utero*. [8] This lack of paternal influence from his own intrauterine exposure was not unexpected. Indeed, it has been proposed that the paternal line can act as a form of control in studies of maternal effects.[9,10] However, this was not our reason for analysing potential paternal exposure transgenerational effects in our earlier paper[8] or in the present analysis of smoking mothers. They were instigated by studies from Sweden based on samples of individuals born in the town of Överkalix. Their longevity and other health outcomes were linked to detailed historical records of harvests experienced by their ancestors. Although most of the emphasis in the Överkalix study was concerned with exposures in mid-childhood[11,12] the studies of three cohorts pooled together have demonstrated effects of exposures of the paternal grandmother [PGM] prenatally to times of very poor harvests on significantly increased mortality of her granddaughters but not her grandsons.[13] Thus, the presumed effect is from the *in utero* exposure of the paternal grandmother to her son and subsequently to his daughter. Such transgenerational effects are now well supported by rodent experiments showing male-line transmissions and often demonstrating sex-specific

1  
2  
3 transmission on outcomes,[14-17] some focusing on imprinted gene expression in  
4  
5 descendants[18] and others on associated epigenetic changes,[19-21] although no  
6  
7 transgenerational signal itself has been clearly defined.[22]  
8  
9

10 Our earlier transgenerational study of intrauterine exposure of non-smoking mothers  
11  
12 did not consider relationships with fetal growth if the study mother was also a smoker.[8]  
13  
14 Here we use the same cohort, the Avon Longitudinal Study of Parents and Children  
15  
16 [ALSPAC], to investigate the fetal growth of offspring of smoking mothers only – comparing  
17  
18 the offspring of mothers and fathers who were themselves exposed to cigarette smoke *in*  
19  
20 *utero* with those who were not exposed in this way. The only study that we are aware of that  
21  
22 has looked at an aspect of this question compared the birth weight of the grandchildren  
23  
24 comparing those born to mothers who smoked according to whether they themselves had  
25  
26 been exposed to their own mothers' smoking *in utero*. [23] Altogether they reported a  
27  
28 decrease of 70g if the grandmother had also smoked during pregnancy. The authors did not  
29  
30 assess whether this difference was merely a function of variation in the amount smoked by  
31  
32 the study mother. Nor did they assess whether there was any effect discernible with the  
33  
34 prenatal smoke exposure of the study father, or whether there was any difference between the  
35  
36 effects depending on the sex of the offspring.  
37  
38  
39  
40  
41  
42  
43

44 The current study was therefore carried out to assess whether there is indeed a  
45  
46 reduction in the growth of the fetus of a smoking mother if her own mother smoked, and/or  
47  
48 whether exposure of the father *in utero* has any effect on the growth of the child of the  
49  
50 smoking mother. In line with the evidence of the accumulating transgenerational human and  
51  
52 animal data outlined above, we hypothesise that any effects will differ between boy and girl  
53  
54 infants.  
55  
56  
57  
58  
59  
60

## METHODS

### Ethics statement

Ethical approval for the ALSPAC study was obtained from the ALSPAC Law and Ethics Committee and the three Avon-based Local Research Ethics Committees: Bristol and Weston Health Authority: E1808 Children of the Nineties: Avon Longitudinal Study of Pregnancy and Childhood (ALSPAC) (28<sup>th</sup> November 1989). Southmead Health Authority: 49/89 Children of the Nineties - "ALSPAC" (5<sup>th</sup> April 1990). Frenchay Health Authority: 90/8 Children of the Nineties. (28<sup>th</sup> June 1990). Written consent was obtained for all assays of biological samples. Ethics Committees considered voluntarily returned postal questionnaires as implied consent.

### Study sample

The data used in these analyses were collected as part of the Avon Longitudinal Study of Parents and Children (ALSPAC), which was designed to assess the ways in which the environment interacts with the genotype to influence health and development.[24] Pregnant women, resident in the study area in south-west England with an expected date of delivery between 1<sup>st</sup> April 1991 and 31<sup>st</sup> December 1992, were invited to take part. About 80% of the eligible population did so.[25]

Information collected from the study parents during their study pregnancy included details of the maternal and paternal grandparents. Figure 1 illustrates the two pathways of possible influence of parental prenatal exposure to cigarette smoke on the study child that we investigate in this paper.

**Figure 1.** Diagram of intergenerational linkage, where MGM = maternal grandmother; PGM = paternal grandmother



## The exposures

The women and their partners were sent a number of questionnaires during pregnancy.[26] These elicited information on their current smoking habits and those of their parents (i.e. the study grandparents). If they reported that their mothers had smoked, they were asked whether their mothers had smoked when expecting them – and, if so, were given the responses: yes / no / don't know from which to select. Thus the parents who replied 'don't know', had a mother who smoked but the parent was unsure whether she had smoked during her pregnancy. We have analysed these data in two ways: (a) assuming that all these women did smoke during pregnancy, and (b) omitting the 'don't knows' from the analyses and only analysing those definitely reported as smoking during the study pregnancy [this we have treated as a sensitivity analysis]. All mothers who themselves did not smoke during the study pregnancy were excluded from these analyses. Consequently we compared two groups of grandchildren: those whose grandmothers had smoked during the pregnancy resulting in their parent and whose mothers had also smoked during the pregnancy that resulted in the study child [MGM+M+ and PGM+M+] with those whose grandmothers had not smoked [MGM-M+ and PGM-M+] respectively. In these analyses all study mothers smoked during pregnancy. Analyses of fetal growth measures took account of the highest amount smoked by the mother during the study pregnancy, grouped as <10; 10-19; 20+ per day.

## Possible confounders

Other data used in the analyses include the study mother's parity (as ascertained from the maternal report of previous pregnancies resulting in either a live- or still-birth, and coded as 0; 1+); gestation (completed weeks: 39+; 37-38; ≤36); mother's partner smoking at the start of pregnancy (primarily reported by the partner, but maternal report was used if the partner report was missing: yes; no); maternal age at the birth of the child (continuous);

1  
2  
3 housing tenure as a measure of socioeconomic background (owned or mortgaged; rented  
4  
5 public housing; all other), maternal education (highest level of educational attainment – in  
6  
7 five levels of increasing achievement), maternal alcohol consumption when the mother first  
8  
9 felt the baby move (not at all; <1 glass per week; and one or more glasses per week).  
10

### 14 **Outcome measures**

15  
16 At delivery the baby was weighed to the nearest gram; ALSPAC study staff visited  
17  
18 the two main delivery hospitals each day and measured the crown-heel length and head  
19  
20 circumference of available infants in a standardised manner.<sup>24</sup> Body mass index (BMI) was  
21  
22 calculated as birth weight/length<sup>2</sup> (g/m<sup>2</sup>). In this study we have used BMI, rather than  
23  
24 ponderal index (PI) as our measure of adiposity at birth; although it is traditional to use PI at  
25  
26 birth, there is little literature to justify this. It has been suggested that the criteria used to  
27  
28 choose whether to use PI or BMI should be a measure that is independent of length.[27] We  
29  
30 have assessed which of the two measures is independent of length at each gestation among  
31  
32 ALSPAC births and found that BMI satisfies the independence requirement more closely  
33  
34 than PI.[8]  
35  
36  
37  
38  
39  
40

### 41 **Statistical analyses**

42  
43 Multivariable linear regression models assessed the study children's adjusted mean  
44  
45 birth weight, crown-heel length, head circumference and BMI by parental prenatal smoking  
46  
47 exposure. All models were adjusted for parity, maternal education, amount mother smoked,  
48  
49 paternal smoking in pregnancy and gestation with MGM-M+ (and PGM-M+) as the reference  
50  
51 categories. Additional models adjusted for maternal age, housing tenure and maternal alcohol  
52  
53 use as well as maternal birth weight.  
54  
55  
56  
57  
58  
59  
60

### Sensitivity analyses

In order to determine consistency of the findings, separate analyses were undertaken for primiparae and multiparae. In order to determine whether the head circumference results were biologically meaningful, we also used the fact that reduced head circumference is associated with lower levels of childhood IQ.[28] Childhood IQ was assessed by trained psychologists at age 8 years (56.2% of eligible children attended), with an abbreviated form of the Wechsler Intelligence Scale for Children (WISC-III).[29] This abbreviated form has been shown to be a valid method for use in research studies.[30]

### RESULTS

In all, there were 3502 births to smoking mothers for whom data were available as to whether their own mothers had smoked when expecting them [Table 1]. Approximately half had such a history. Fewer women had information about the prenatal exposures of the father of their study child [n= 2354], but again exposure was approximately 50:50.

**Table 1. The study sample of mothers who smoked during pregnancy**

|                                                                       | MGM+        | MGM-        | PGM+        | PGM-        |
|-----------------------------------------------------------------------|-------------|-------------|-------------|-------------|
| <b>No. in study</b>                                                   | <b>1781</b> | <b>1721</b> | <b>1209</b> | <b>1145</b> |
| <i>Maternal smoking in pregnancy (cigarettes per day)<sup>a</sup></i> |             |             |             |             |
| <10                                                                   | 500 (28.0)  | 699 (40.6)  | 402 (33.3)  | 460 (40.2)  |
| 10-19                                                                 | 811 (45.6)  | 698 (40.6)  | 524 (43.3)  | 475 (41.5)  |
| 20+                                                                   | 469 (26.4)  | 324 (18.8)  | 283 (23.4)  | 209 (18.3)  |
|                                                                       | P < 0.001   |             | P < 0.001   |             |
| <i>Parity<sup>a</sup></i>                                             |             |             |             |             |
| 0                                                                     | 747 (43.3)  | 779 (46.1)  | 511 (43.3)  | 537 (47.8)  |
| 1+                                                                    | 980 (56.8)  | 910 (53.9)  | 668 (56.7)  | 586 (52.2)  |
|                                                                       | P = 0.092   |             | P = 0.031   |             |
| <i>Maternal education level<sup>a</sup></i>                           |             |             |             |             |
| CSE or less                                                           | 598 (39.6)  | 399 (26.3)  | 362 (33.8)  | 284 (27.6)  |
| Vocational                                                            | 195 (12.9)  | 184 (12.2)  | 144 (13.5)  | 126 (12.3)  |
| O Level                                                               | 493 (32.6)  | 548 (36.2)  | 367 (34.3)  | 357 (34.7)  |
| A Level                                                               | 181 (12.0)  | 291 (19.2)  | 156 (14.6)  | 195 (19.0)  |
| Degree                                                                | 45 (3.0)    | 93 (6.1)    | 41 (3.8)    | 66 (6.4)    |
|                                                                       | P < 0.001   |             | P < 0.001   |             |
| <i>Gestation(weeks)<sup>a</sup></i>                                   |             |             |             |             |
| 39+                                                                   | 1328 (75.1) | 1279 (74.6) | 860 (71.5)  | 868 (75.9)  |
| 37/38                                                                 | 305 (17.3)  | 312 (18.2)  | 249 (20.7)  | 197 (17.2)  |
| <37                                                                   | 135 (7.6)   | 123 (7.2)   | 94 (7.8)    | 78 (6.8)    |
|                                                                       | P = 0.070   |             | P = 0.048   |             |
| <i>Partner smoking<sup>a</sup></i>                                    |             |             |             |             |
| No                                                                    | 478 (29.7)  | 487 (30.3)  | 341 (28.3)  | 344 (30.0)  |
| Yes                                                                   | 1130 (70.3) | 1120 (69.7) | 863 (71.7)  | 801 (70.0)  |
|                                                                       | P = 0.072   |             | P = 0.360   |             |
| <i>Housing tenure<sup>a</sup></i>                                     |             |             |             |             |
| Owned/mortgaged                                                       | 736 (44.5)  | 965 (59.1)  | 583 (50.9)  | 677 (61.8)  |
| nted public                                                           | 628 (38.0)  | 406 (24.9)  | 386 (33.7)  | 247 (22.5)  |
| Rented private/other                                                  | 291 (17.6)  | 263 (16.1)  | 177 (15.5)  | 172 (15.7)  |
|                                                                       | P < 0.001   |             | P < 0.001   |             |
| <i>Maternal alcohol<sup>a</sup></i>                                   |             |             |             |             |
| Never                                                                 | 870 (50.9)  | 827 (49.6)  | 602 (51.7)  | 566 (51.5)  |
| <1 glass per week                                                     | 563 (32.9)  | 530 (31.8)  | 376 (32.3)  | 348 (31.6)  |
| 1+ glasses per week                                                   | 277 (16.2)  | 311 (18.7)  | 186 (16.0)  | 186 (16.9)  |
|                                                                       | P = 0.170   |             | P = 0.830   |             |
| <i>Maternal age (yr)<sup>b</sup></i>                                  |             |             |             |             |
|                                                                       | 25.8 (5.1)  | 26.8 (5.1)  | 26.1 (5.1)  | 26.8 (5.0)  |
|                                                                       | P < 0.001   |             | P = 0.003   |             |
| <i>Maternal birthweight (kg)<sup>b</sup></i>                          |             |             |             |             |
|                                                                       | 3.12 (0.67) | 3.32 (0.63) | 3.20 (0.65) | 3.22 (0.67) |
|                                                                       | P < 0.001   |             | P = 0.570   |             |

<sup>a</sup> n(%); <sup>b</sup> mean (SD); MGM maternal grandmother; PGM paternal grandmother; + smoked in pregnancy; - did not smoke in pregnancy

1  
2  
3 Comparison of data concerning the potential confounders [Table 1] indicates that if  
4  
5 either grandmother had smoked prenatally, then the smoking study mother herself was more  
6  
7 likely to be a heavy smoker, to have had lower educational attainment and to be younger; in  
8  
9 addition the family was more likely to be living in rented public housing. Not surprisingly,  
10  
11 the women who had been exposed in utero (i.e. MGM+) had considerably lower mean birth  
12  
13 weight themselves (by 199g) than those not exposed (MGM-). There was no difference in  
14  
15 prevalence of smoking by the study father if his own mother had smoked during pregnancy.  
16  
17  
18  
19

20  
21 Table 2 compares the birth measurements of study children born to parents who had  
22  
23 been exposed to smoking *in utero*. It can be seen that for the women who had themselves  
24  
25 been exposed *in utero*, there was just one statistically significant unadjusted association in  
26  
27 their progeny (a lower birth weight for girls), but that this was no longer significant upon  
28  
29 adjustment. For paternal *in utero* exposure, however, there were several unadjusted  
30  
31 associations [with girls' birth weight and birth length, and with boys' birth length and head  
32  
33 circumference]. On adjustment, the association with head circumference remained with a  
34  
35 0.35cm reduction [95% CI -0.57, -0.14] for boys [P = 0.001], but the association for girls was  
36  
37 quite different: +0.08 [95%CI -0.11, +0.28]; (P for interaction = 0.006).  
38  
39  
40  
41  
42  
43  
44  
45  
46  
47  
48  
49  
50  
51  
52  
53  
54  
55  
56  
57  
58  
59  
60

**Table 2. Mean difference (P value) [95% CI] in birth measurements of children born to smoking mothers, comparing those where the child's grandmother had smoked with those who had not**

|                                     | <b>MGM+ M+ v. MGM- M+</b>    |                             | <b>PGM+ M+ v. PGM- M+</b>    |                              |
|-------------------------------------|------------------------------|-----------------------------|------------------------------|------------------------------|
|                                     | <b>Unadjusted</b>            | <b>Adjusted<sup>a</sup></b> | <b>Unadjusted</b>            | <b>Adjusted<sup>a</sup></b>  |
| <b>BIRTHWEIGHT (g)</b>              |                              |                             |                              |                              |
| Boy                                 | -13 <sup>(0.65)</sup>        | -29 <sup>(0.24)</sup>       | -55 <sup>(0.11)</sup>        | -50 <sup>(0.074)</sup>       |
|                                     | [-69, +43]                   | [-77, +19]                  | [-123, +13]                  | [-104, +5]                   |
| Girl                                | <b>-63<sup>(0.022)</sup></b> | -31 <sup>(0.22)</sup>       | <b>-88<sup>(0.010)</sup></b> | -11 <sup>(0.28)</sup>        |
|                                     | <b>[-116, -9]</b>            | [-81, +18]                  | <b>[-155, -22]</b>           | [-67, +45]                   |
| <b>BIRTH LENGTH (cm x100)</b>       |                              |                             |                              |                              |
| Boy                                 | +8 <sup>(0.59)</sup>         | -0 <sup>(1.00)</sup>        | <b>-37<sup>(0.035)</sup></b> | -29 <sup>(0.070)</sup>       |
|                                     | [-20, +36]                   | [-28, +28]                  | <b>[-72, -3]</b>             | [-61, +3]                    |
| Girl                                | -11 <sup>(0.44)</sup>        | +7 <sup>(0.59)</sup>        | <b>-37<sup>(0.037)</sup></b> | +1 <sup>(0.96)</sup>         |
|                                     | [-39, +17]                   | [-20, +35]                  | <b>[-71, -2]</b>             | [-31, +33]                   |
| <b>HEAD CIRCUMFERENCE (cm x100)</b> |                              |                             |                              |                              |
| Boy                                 | +4 <sup>(0.66)</sup>         | -3 <sup>(0.74)</sup>        | <b>-35<sup>(0.003)</sup></b> | <b>-35<sup>(0.001)</sup></b> |
|                                     | [-14, +23]                   | [-22, +16]                  | <b>[-59, -12]</b>            | <b>[-57, -14]</b>            |
| Girl                                | -9 <sup>(0.28)</sup>         | -3 <sup>(0.76)</sup>        | -17 <sup>(0.107)</sup>       | +8 <sup>(0.39)</sup>         |
|                                     | [-27, +8]                    | [-19, +14]                  | [-39, +4]                    | [-11, +28]                   |
| <b>BMI ((kg/m<sup>2</sup>)*10)</b>  |                              |                             |                              |                              |
| Boy                                 | -0.3 <sup>(0.73)</sup>       | -0.8 <sup>(0.37)</sup>      | -1.2 <sup>(0.24)</sup>       | -1.0 <sup>(0.31)</sup>       |
|                                     | [-1.9, +1.3]                 | [-2.5, +0.9]                | [-3.1, +0.8]                 | [-2.9, +0.9]                 |
| Girl                                | -1.8 <sup>(0.41)</sup>       | -1.3 <sup>(0.15)</sup>      | -2.1 <sup>(0.056)</sup>      | -0.6 <sup>(0.57)</sup>       |
|                                     | [-3.5, -0.1]                 | [-3.1, +0.5]                | [-4.2, +0.1]                 | [-2.6, +1.5]                 |

<sup>a</sup>Adjusted for maternal parity, maternal education, partner smoked in pregnancy, gestation of study child and the amount the mother smoked

[N.B. the data for birth length and head circumference are given in cm x 100 so as to aid viewing]

### Sensitivity analyses

The analyses were repeated for primiparae and multiparae separately [Supplementary Tables 1 and 2]. The only significant association that remained after adjustment concerned the head circumference of the study sons. The effect sizes were similar for each parity group: for primiparae the effect size was -0.34 [95%CI -0.66, -0.02]cm, P = 0.036; for multiparae the adjusted effect size was similar at -0.35 [95% CI -0.64, -0.06]cm, P= 0.017. Again there were significant interactions with the sex of the child.

Since this association with head circumference was consistent but unexpected, and since there is evidence that birth head circumference is associated with childhood IQ,[30] we used the same study methodology to assess whether a similar association was apparent between paternal prenatal exposure and childhood IQ. Table 3 demonstrates that there was indeed a reduction in adjusted mean IQ of 2.90 points [95% CI -5.72, -0.08] (P = 0.044) for sons of exposed fathers, but no such association for daughters, although the interaction with sex was not statistically significant. Full scale IQ is made up of the sum of two components [performance IQ and verbal IQ] that are, in general, known to have different genetic and environmental components.[31] We therefore have analysed the data to assess whether the associations with paternal grandmothers' smoking during pregnancy are associated with one of these components in particular. We found that paternal exposure *in utero* had a greater effect on his son's verbal IQ [mean adjusted difference -3.65 points; 95% CI -6.60, -0.70], but with little difference in performance IQ [mean -1.40 [95% CI -4.39, +1.60] points.

**Table 3. Mean difference [95% CI] in birth measurements of children born to smoking mothers, comparing those where the child's grandmother had smoked with those who had not.**

|                       | MGM+M+ v. MGM-M+      |                       | PGM+M+ v. PGM-M+      |                       |
|-----------------------|-----------------------|-----------------------|-----------------------|-----------------------|
|                       | Unadjusted            | Adjusted <sup>a</sup> | Unadjusted            | Adjusted <sup>a</sup> |
| <b>Total IQ</b>       |                       |                       |                       |                       |
| Boys                  | <b>-3.87</b>          | -2.45                 | <b>-4.00</b>          | <b>-2.90</b>          |
| 95% CI                | <b>[-6.34, -1.40]</b> | [-4.96, +0.07]        | <b>[-6.92, -1.08]</b> | <b>[-5.72, -0.08]</b> |
| P value               | <b>0.002</b>          | 0.057                 | <b>0.007</b>          | <b>0.044</b>          |
| Number                | 694                   | 612                   | 507                   | 482                   |
| Girls                 | <b>-2.50</b>          | -0.40                 | <b>-3.03</b>          | -1.36                 |
| 95% CI                | <b>[-4.90, -0.11]</b> | [-2.85, +2.05]        | <b>[-5.78, -0.28]</b> | [-4.07, +1.36]        |
| P value               | <b>0.041</b>          | 0.749                 | <b>0.031</b>          | 0.327                 |
| Number                | 617                   | 551                   | 456                   | 436                   |
| <b>Performance IQ</b> |                       |                       |                       |                       |
| Boys                  | <b>-2.64</b>          | -1.48                 | -2.44                 | -1.40                 |
| 95% CI                | <b>[-5.20, -0.08]</b> | [-4.20, +1.24]        | [-5.40, +0.50]        | [-4.39, +1.60]        |
| P value               | <b>0.043</b>          | 0.287                 | 0.104                 | 0.360                 |
| Number                | 698                   | 616                   | 510                   | 485                   |
| Girls                 | -2.46                 | -0.50                 | <b>-3.03</b>          | -1.74                 |
| 95% CI                | [-5.01, +0.09]        | [-3.19, +2.19]        | <b>[-5.88, -0.18]</b> | [-4.69, +1.20]        |
| P value               | 0.059                 | 0.716                 | <b>0.037</b>          | 0.245                 |
| N                     | 619                   | 552                   | 457                   | 436                   |
| <b>Verbal IQ</b>      |                       |                       |                       |                       |
| Boys                  | <b>-3.75</b>          | -2.40                 | <b>-4.73</b>          | <b>-3.65</b>          |
| 95% CI                | <b>[-6.30, -1.21]</b> | [-5.00, +1.20]        | <b>[-7.81, -1.66]</b> | <b>[-6.60, -0.70]</b> |
| P value               | <b>0.004</b>          | 0.070                 | <b>0.003</b>          | <b>0.015</b>          |
| Number                | 697                   | 615                   | 509                   | 484                   |
| Girls                 | -1.98                 | -0.15                 | -2.48                 | -0.81                 |
| 95% CI                | [-4.37, +0.42]        | [-2.60, +2.30]        | [-5.28, +0.32]        | [-3.54, +1.92]        |
| P value               | 0.106                 | 0.906                 | 0.082                 | 0.561                 |
| Number                | 617                   | 551                   | 456                   | 436                   |

<sup>a</sup>Adjusted for maternal education, parity, partner smoked in pregnancy, gestation of study child and the amount the mother smoked.



## DISCUSSION

We investigated whether the parents' exposure *in utero* to their own mothers' smoking was associated with differences in fetal growth among women who smoked in pregnancy, and showed an association between paternal *in utero* exposure and a reduced head circumference in his sons, but not in his daughters. This was an unexpected finding. A series of sensitivity analyses showed the effect to be almost identical in children born to primiparae and to those born to multiparae. We assessed whether there was confirmatory evidence of an impact on brain size by looking at the IQ of the children. We found a significant reduction in total IQ in 8-year-old boys (but not girls) whose paternal grandmother smoked during the pregnancy resulting in the study child's father. The IQ effect size was similar in both parity groups and was still present when birth head circumference was taken into account [data not shown]. We showed a stronger association with verbal IQ than performance IQ. To our knowledge there have been no previous studies that have considered any effects of paternal exposure to smoking *in utero* on his offspring.

### Strengths and limitations

There are a number of limitations to this study: (i) Details of smoking of parents and grandparents depend on parental self-report – however there is considerable information to indicate that adults are unlikely to lie about smoking habits, especially when using anonymised self-completion questionnaires;<sup>[32]</sup> here we have shown that the mean birth weight of the study mothers who had reported that their own mothers had smoked when they were *in utero* was 199g lower than that of those who had reported that their mother did not smoke at that time, which was about the expected order of difference if the mothers had reported accurately; (ii) although the amount the parents smoked was reported, there was no

1  
2  
3 estimate requested for the amount smoked by the grandmothers when pregnant with the study  
4  
5 parent – this may have been associated with the outcome, but it is difficult to postulate how  
6  
7 such effects might differ between the sexes of the study children; (iii) although the ALSPAC  
8  
9 study is large, the numbers of women who smoked throughout pregnancy and for whom  
10  
11 details are available on the grandmothers' smoking are reduced and consequently the  
12  
13 statistical power is relatively low. Among the strengths of this study are the following: (a) it  
14  
15 tested a prior hypothesis that early life exposures can have phenotypic effects down the  
16  
17 paternal line with sex-specific outcomes; (b) the information on grandparental and parental  
18  
19 smoking was collected prior to the birth of the study child, and consequently cannot have  
20  
21 been biased by knowledge of fetal size; (c) birth length and head circumference were  
22  
23 ascertained by trained measurers using standard techniques, as opposed to the generally  
24  
25 inaccurate methods used in most delivery units; (d) IQ was measured using standard  
26  
27 methodology by trained psychologists; (e) the study was based on a relatively large  
28  
29 population sample, and results are therefore likely to be generalisable.  
30  
31  
32  
33  
34  
35

### 36 **Meaning of the study**

37  
38 Our previous study of non-smoking mothers, looking at the effect of parental  
39  
40 exposure *in utero*, found their sons were larger at birth (both weight and BMI) if the maternal  
41  
42 grandmother had smoked in the pregnancy that resulted in the study mother. There was no  
43  
44 discernible effect of paternal prenatal exposure on the study child's birth weight or BMI;  
45  
46 however there was a slight *increase* in head circumference among the boys born to fathers  
47  
48 who had been exposed *in utero* [mean difference +0.08 cm; 95% CI -0.03, +0.19].[8]  
49  
50  
51  
52  
53

54 Attributing the smaller head circumference in boys of smoking mothers to the prenatal  
55  
56 exposure of the father through his own mother's smoking, raises the question of possible  
57  
58  
59  
60

1  
2  
3 mechanisms. How might the information be transmitted via his sperm or in some other way?  
4  
5 As we noted in the introduction to this paper there is increasing evidence that exposures,  
6  
7 especially in early life, can lead to enduring changes in the epigenome that, in turn, can  
8  
9 modify gene expression. Whilst transgenerational epigenetic inheritance remains  
10  
11 controversial, at least in humans,[33] the phenomenon of genomic imprinting establishes the  
12  
13 principle that epigenetic marks such as DNA methylation placed in one generation can  
14  
15 influence gene expression in the next. One such imprinted gene is the Insulin Growth Factor  
16  
17 2 (*IGF2*) which is expressed only from the paternally-derived chromosome 11, the maternal  
18  
19 copy being epigenetically silenced. *IGF2* encodes an endocrine and autocrine/paracrine  
20  
21 acting factor important in directing growth during prenatal development.[34,35] Maternal  
22  
23 smoking has been shown to be associated with a 5% higher DNA methylation level at the  
24  
25 *IGF2* DMR (differentially methylated region) in the newborn infant,[5] and interestingly in  
26  
27 the context of our study, this methylation shift is specific to male offspring. Thus it is  
28  
29 possible that the study father's *IGF2* DMR had been epigenetically modified (including in his  
30  
31 fetal testes) by his mother's smoking throughout pregnancy. Furthermore it is plausible that  
32  
33 this epigenetic state could be transmitted via his sperm to the study offspring. Imprinted gene  
34  
35 regions tend to escape the usual widespread erasure of DNA methylation from the paternally-  
36  
37 derived genome in the pre-implantation embryo soon after fertilisation.[36] In support of  
38  
39 paternal effects generally, there is a report of hypomethylation at the *IGF2* DMR in umbilical  
40  
41 cord blood being associated with paternal obesity suggesting a preconceptional impact of the  
42  
43 obesity (and/or exposures related to it) on the reprogramming of imprint marks during  
44  
45 spermatogenesis.[37]  
46  
47  
48  
49  
50  
51  
52  
53  
54  
55  
56  
57  
58  
59  
60

### Unanswered questions and further research

There are few studies on head circumference at birth. This is possibly because the measurements are generally inaccurate. Pilot studies before the start of the ALSPAC study had demonstrated that it was usually the student midwife who was given the task of measuring the circumference of the baby's head; she tended to have had little or no training and the measurements made were grossly inaccurate. For this study we only used measurements that were made by our own staff, after detailed training and with repeated validation over time. Detailed studies with accurate data to test the hypothesis raised by the results of this study are needed.

### In conclusion

When the mother is a smoker, we found no effect of her own tobacco exposure *in utero* on the fetal growth of her children. However, when the mother is a smoker, paternal exposure *in utero* is associated with a reduced head circumference at birth and IQ at 8 years in sons, but not daughters. We had no prior hypothesis that head circumference would be associated, particularly among sons, so these results must be considered as hypothesis generating, and require testing in further longitudinal data sets.

## Acknowledgements

We are extremely grateful to all the families who took part in this study, the midwives for their help in recruiting them, and the whole ALSPAC team, which includes interviewers, computer and laboratory technicians, clerical workers, research scientists, volunteers, managers, receptionists and nurses.

**Authors' contributions:** MP and JG had the idea; KN, SG and LLM carried out the statistical analyses; JG and MP wrote the first draft and all authors contributed to the final manuscript.

**Data sharing:** The ALSPAC data can be used by bona fide researchers. See the study website for the conditions: <http://www.bristol.ac.uk/alspac/researchers/>

**Funding:** The UK Medical Research Council ([www.mrc.ac.uk](http://www.mrc.ac.uk)), the Wellcome Trust ([www.Wellcome.ac.uk](http://www.Wellcome.ac.uk)) and the University of Bristol ([www.bristol.ac.uk](http://www.bristol.ac.uk)) currently provide core support for ALSPAC. The statistical analyses for this project were undertaken with funding from the Medical Research Council [grant no. G1100226]. The funders had no role in study design, data collection, statistical analysis, decision to publish, or preparation of the manuscript.

**Competing interests:** The authors have no competing interests.

## References

1. Barker DJ. In utero programming of chronic disease. *Clin Sci* 1998;**95**:115-128.
2. Gluckman PD, Hanson MA, Buklijas T, et al. Epigenetic mechanisms that underpin metabolic and cardiovascular disease. *Nat Rev Endocrinol* 2009;**5**:401- 408.  
doi:10.1038/nrendo.2009.102
3. Relton C, Davey-Smith G, Ozanne S. Developmental Epigenetic Programming in Diabetes and Obesity. In: Jirtle R, Tyson E, eds. *Environmental Epigenomics in Health and Disease; Epigenetics and Complex Diseases*. Berlin Heidelberg: Springer 2013:235-253.
4. Breton CV, Byun HM, Wenten M, et al. Prenatal tobacco smoke exposure affects global and gene-specific DNA methylation. *Am J Respir Crit Care Med* 2009;**180**:462-467. Doi. 10.1164/rccm.200901-0135OC
5. Murphy SK, Adigun A, Huang Z, et al. Gender-specific methylation differences in relation to prenatal exposure to cigarette smoke. *Gene* 2012;**15**:36-43.  
doi.org/10.1016/j.gene.2011.11.062.
6. Joubert BR, Håberg SE, Nilsen RM, et al. 450K epigenome-wide scan identifies differential DNA methylation in newborns related to maternal smoking during pregnancy. *Environ Health Perspect* 2012;**120**:1425-1431. 10.1289/ehp.1205412.
7. Lee KKW, Pausova Z. Cigarette smoking and DNA methylation. *Front Genet* 2013;**4**:132.  
doi: 10.3389/fgene.2013.00132
8. Miller LL, Pembrey M, Davey Smith G, et al. Is the growth of the fetus of a non-smoking mother influenced by the smoking of either grandmother while pregnant? *PLoS ONE* 2014;  
In press.

- 1  
2  
3 9.Davey Smith G. Assessing intrauterine influences on offspring outcomes: Can  
4 epidemiological studies yield robust outcomes? *Basic Clin Pharmacol Toxicol* 2008;**102**:245-  
5 256. DOI: 10.1111/j.1742-7843.2007.00191.x  
6  
7  
8  
9  
10 10.Macdonald-Wallis C, Tobias JH, Davey Smith G, et al. Parental smoking during  
11 pregnancy and offspring bone mass at age 10 years: findings from a prospective birth cohort.  
12 *Osteoporos Int* 2011; **22**:1809-1819. Doi: 10.1007/s00198-010-1415-y  
13  
14  
15  
16  
17 11.Bygren LO, Kaati G, Edvinsson S. Longevity determined by ancestors' over nutrition  
18 during their slow growth period. *Acta Biotheor* 2001;**49**:53-59. Doi.  
19  
20 10.1023/A:1010241825519  
21  
22  
23  
24 12.Kaati G, Bygren LO, Edvinsson S. Cardiovascular and diabetes mortality determined by  
25 nutrition during parents' and grandparents' slow growth period. *Eur J Hum Genet*  
26 2002;**10**:682-688. DOI:10.1038/sj.ejhg.5200859  
27  
28  
29  
30  
31  
32 13.Pembrey ME, Bygren LO, Kaati G et al. Sex-specific, male-line transgenerational  
33 responses in humans. *Eur J Hum Genet* 2006;**14**:159–166. doi:10.1038/sj.ejhg.5201538  
34  
35  
36  
37 14.Anway MD, Cupp AS, Uzumcu M, et al. Epigenetic transgenerational actions of  
38 endocrine disruptors and male fertility. *Science* 2005;**308**:1466-1469. DOI:  
39 10.1126/science.1108190  
40  
41  
42  
43 15.Franklin TB, Russig H, Weiss IC et al. Epigenetic transmission of the impact of early  
44 stress across generations. *Biol Psychiatr* 2010;**68**:408-  
45 415.doi10.1016/j.biopsych.2010.05.036  
46  
47  
48  
49  
50 16.Ng SF, Lin RC, Laybutt DR et al. Chronic high-fat diet in fathers programs  $\beta$ -cell  
51 dysfunction in female rat offspring. *Nature* 2010;**467**:963-966. doi:10.1038/nature09491  
52  
53  
54  
55 17.Zeybel M, Hardy T, Wong YK, et al. Multigenerational epigenetic adaptation of the  
56 hepatic wound-healing response. *Nat Med* 2012;**18**:1369–1377. doi:10.1038/nm.2893  
57  
58  
59  
60

- 1  
2  
3 18.Dunn GA, Bale TL. Maternal high-fat diet effects on third-generation female body size via  
4 the paternal lineage. *Endocrinol* 2011;**152**:2228-2236. Doi:10.1210/en.2010.1461  
5  
6  
7 19.Burdge GC, Slater-Jefferies J, Torrens C, et al. Dietary protein restriction of pregnant rats  
8 in the F0 generation induces altered methylation of hepatic gene promoters in the adult male  
9 offspring in the F1 and F2 generations. *Br J Nutr* 2007;**97**:435-439. Doi  
10 10.1017/S0007114507352392  
11  
12 20.Carone BR, Fauquier L, Habib N, et al. Paternally induced transgenerational  
13 environmental reprogramming of metabolic gene expression in mammals. *Cell*  
14 2010;**143**:1084-1096. Doi:10.1016/j.cell.2010.12.008  
15  
16 21.Dias BG, Ressler KJ. Parental olfactory experience influences behavior and neural  
17 structure in subsequent generations. *Nat Neurosci* 2014;**17**:89-96. Doi: doi:10.1038/nn.3594  
18  
19 22.Daxinger L, Whitelaw E. Understanding transgenerational epigenetic inheritance via the  
20 gametes in mammals. *Nat Rev Genet* 2012;**31**:153-162. doi:10.1038/nrg3188  
21  
22 23.Misra DP, Astone N, Lynch CD. Maternal smoking and birth weight: interaction with  
23 parity and mother's own in utero exposure to smoking. *Epidemiol* 2005;**16**:288–293. doi:  
24 10.1097/01.ede.0000158198.59544.cf  
25  
26 24.Golding J, Pembrey M, Jones R. ALSPAC—the Avon Longitudinal Study of Parents and  
27 Children. I. Study methodology. *Paediatr Perinatal Epidemiol* 2001;**15**:74–87. DOI:  
28 10.1046/j.1365-3016.2001.00325.x  
29  
30 25.Boyd A, Golding J, Macleod J, et al. Cohort Profile: The 'Children of the 90s'—the index  
31 offspring of the Avon Longitudinal Study of Parents and Children. *Int J Epidemiol*  
32 2012;**42**:111-127. doi. 10.1093/ije/dys064  
33  
34 26. ALSPAC web: [http://www.bristol.ac.uk/alspac/researchers/resources-available/data-  
36 details/questionnaires/](http://www.bristol.ac.uk/alspac/researchers/resources-available/data-<br/>35 details/questionnaires/). Accessed 2 December 2013.  
37  
38  
39  
40  
41  
42  
43  
44  
45  
46  
47  
48  
49  
50  
51  
52  
53  
54  
55  
56  
57  
58  
59  
60



- 1  
2  
3 27.Cole TJ, Henson GL, Tremble JM, et al. Birthweight for length: ponderal index, body  
4 mass index or Benn index? *Ann Hum Biol* 1997;**24**:289–298.  
5  
6  
7 doi:10.1080/03014469700005032  
8  
9  
10 28.Gale CR, O'Callaghan FJ, Bredow M, et al. The influence of head growth in fetal life,  
11 infancy, and childhood on intelligence at the ages of 4 and 8 years. *Pediatr* 2006;**118**:1486-  
12 1492. doi: 10.1542/peds.2005-2629  
13  
14  
15 29.Wechsler D, Golombok S, Rust J. WISC-IIIUK Wechsler Intelligence Scale for Children.  
16 Sidcup, UK: Psychological Corp 1992.  
17  
18  
19  
20 30. Gunnell D, Miller LL, Rogers I, et al. Association of Insulin-like Growth Factor I and  
21 Insulin-like Growth Factor–Binding Protein-3 With Intelligence Quotient Among 8-to 9-  
22 Year-Old Children in the Avon Longitudinal Study of Parents and Children. *Pediatr* 2005;  
23 **116**:e681-e686. doi: 10.1542/peds.2004-2390  
24  
25  
26  
27  
28  
29  
30 31. Dickens WT, Flynn JR. Heritability estimates versus large environmental effects: the IQ  
31 paradox resolved. *Psychol Rev* 2001;**108**:346. Doi:10.1037/0033-295X.108.2.346  
32  
33  
34  
35 32. Klebanoff MA, Levine RJ, Clemens JD, et al. Serum cotinine concentration and self-  
36 reported smoking during pregnancy. *Am J Epidemiol* 1998;**148**:259-262.  
37  
38  
39  
40 33.Grossniklaus U, Kelly B, Ferguson-Smith AC, et al. Transgenerational epigenetic  
41 inheritance: how important is it? *Nat Rev Genet* 2013;**14**:228-235. doi:10.1038/nrg3435  
42  
43  
44 34.LeRoith D, Lowe WL. Growth factors. In: Melmed S, Conn PM, eds. *Endocrinology:*  
45 *Basic and Clinical Principles*, 2<sup>nd</sup> edition. Totowa, New Jersey: Humana Press 2005:85-91.  
46  
47  
48 35 Demetriou C, Abu-Amero S, Thomas AC, et al. Paternally expressed, imprinted Insulin-1  
49 like growth factor-2 in chorionic villi correlates significantly with birth weight. *PLoS ONE*  
50 2014;doi:10.1371/journal.pone.0085454.  
51  
52  
53  
54  
55  
56  
57  
58  
59  
60

1  
2  
3 36.Seisenberger S, Peat JR, Hore TA, et al. Reprogramming DNA methylation in the  
4 mammalian life cycle: building and breaking epigenetic barriers. *Philos Trans R Soc Lond B*  
5 *Biol Sci* 2013;**368**: 20110330. doi: 10.1098/rstb.2011.0330.  
6  
7  
8

9  
10 37.Soubry A, Schildkraut JM, Murtha A, et al. Paternal obesity is associated with IGF2  
11 hypomethylation in newborns: results from a Newborn Epigenetics Study (NEST) cohort.  
12 *BMC Med* 2013;29:doi:10.1186/1741-7015-11-29  
13  
14  
15  
16  
17  
18  
19  
20  
21  
22  
23  
24  
25  
26  
27  
28  
29  
30  
31  
32  
33  
34  
35  
36  
37  
38  
39  
40  
41  
42  
43  
44  
45  
46  
47  
48  
49  
50  
51  
52  
53  
54  
55  
56  
57  
58  
59  
60

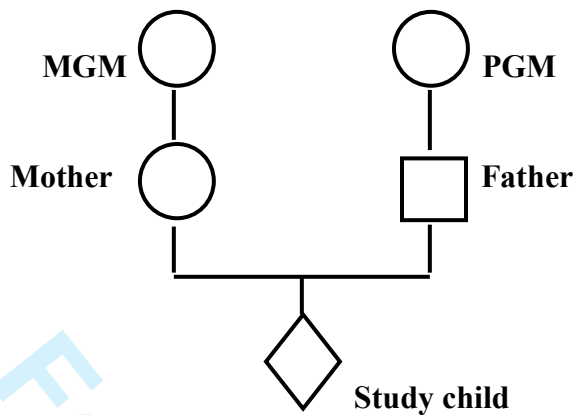

For peer review only

1  
2  
3  
4  
5  
6  
7  
8  
9  
10  
11  
12  
13  
14  
15  
16  
17  
18  
19  
20  
21  
22  
23  
24  
25  
26  
27  
28  
29  
30  
31  
32  
33  
34  
35  
36  
37  
38  
39  
40  
41  
42  
43  
44  
45  
46  
47  
48  
49  
50  
51  
52  
53  
54  
55  
56  
57  
58  
59  
60

Supplementary Table 1. Mean difference (<sup>P</sup> value) [95% CI] in birth measurements of children born to smoking mothers, comparing those where the child's grandmother had smoked with those who had not when the child is the mother's firstborn

|                                     | <u>MGM+ M+ v. MGM- M+</u> |                        | <u>PGM+ M+ v. PGM- M+</u> |                              |
|-------------------------------------|---------------------------|------------------------|---------------------------|------------------------------|
|                                     | Unadjusted                | Adjusted <sup>a</sup>  | Unadjusted                | Adjusted <sup>a</sup>        |
| <b>BIRTHWEIGHT (g)</b>              |                           |                        |                           |                              |
| Boy                                 | -21 <sup>(0.64)</sup>     | +5 <sup>(0.90)</sup>   | -66 <sup>(0.22)</sup>     | -51 <sup>(0.22)</sup>        |
|                                     | [-109, +67]               | [-71, +80]             | [-172, +40]               | [-134, +31]                  |
| Girl                                | -79 <sup>(0.057)</sup>    | -15 <sup>(0.69)</sup>  | -86 <sup>(0.077)</sup>    | -17 <sup>(0.69)</sup>        |
|                                     | [-160, +2]                | [-92, +61]             | [-181, +9]                | [-101, +67]                  |
| <b>BIRTH LENGTH (cm x100)</b>       |                           |                        |                           |                              |
| Boy                                 | +12 <sup>(0.58)</sup>     | +22 <sup>(0.27)</sup>  | -31 <sup>(0.22)</sup>     | -33 <sup>(0.12)</sup>        |
|                                     | [-29, +52]                | [-17, +61]             | [-82, +19]                | [-75, +09]                   |
| Girl                                | -26 <sup>(0.21)</sup>     | +12 <sup>(0.58)</sup>  | -34 <sup>(0.17)</sup>     | -9 <sup>(0.71)</sup>         |
|                                     | [-66, +14]                | [-31, +54]             | [-84, +15]                | [-57, +39]                   |
| <b>HEAD CIRCUMFERENCE (cm x100)</b> |                           |                        |                           |                              |
| Boy                                 | +6 <sup>(0.69)</sup>      | +7 <sup>(0.62)</sup>   | -37 <sup>(0.051)</sup>    | <b>-34<sup>(0.036)</sup></b> |
|                                     | [-23, +34]                | [-21, +35]             | [-74, +00]                | <b>[-66, -2]</b>             |
| Girl                                | -23 <sup>(0.068)</sup>    | +1 <sup>(0.94)</sup>   | -12 <sup>(0.46)</sup>     | +6 <sup>(0.69)</sup>         |
|                                     | [-48, +2]                 | [-25, +27]             | [-43, +20]                | [-23, +35]                   |
| <b>BMI ((kg/m<sup>2</sup>)x10)</b>  |                           |                        |                           |                              |
| Boy                                 | -0.6 <sup>(0.59)</sup>    | -0.1 <sup>(0.92)</sup> | -0.6 <sup>(0.65)</sup>    | -1.1 <sup>(0.37)</sup>       |
|                                     | [-2.8, +1.6]              | [-2.3, +2.1]           | [-3.2, +2.0]              | [-3.5, +1.3]                 |
| Girl                                | -2.6 <sup>(0.061)</sup>   | -0.7 <sup>(0.64)</sup> | -2.6 <sup>(0.13)</sup>    | -1.6 <sup>(0.35)</sup>       |
|                                     | [-5.2, +0.1]              | [-3.6, +2.2]           | [-6.0, +0.8]              | [-5.0, +1.8]                 |

<sup>a</sup>Adjusted for maternal education, partner smoked in pregnancy, gestation of study child and the amount the mother smoked

[N.B. the data for birth length and head circumference are given in cm x 100 so as to aid viewing]

Supplementary Table 2. Mean difference (P value) [95% CI] in birth measurements of children born to smoking mothers, comparing those where the child's grandmother had smoked with those who had not when the child is NOT the mother's firstborn

|                                     | <u>MGM+ M+ v. MGM- M+</u> |                        | <u>PGM+ M+ v. PGM- M+</u>     |                              |
|-------------------------------------|---------------------------|------------------------|-------------------------------|------------------------------|
|                                     | Unadjusted                | Adjusted <sup>a</sup>  | Unadjusted                    | Adjusted <sup>a</sup>        |
| <b>BIRTHWEIGHT (g)</b>              |                           |                        |                               |                              |
| Boy                                 | -16 <sup>(0.67)</sup>     | -52 <sup>(0.099)</sup> | -84 <sup>(0.061)</sup>        | -51 <sup>(0.17)</sup>        |
|                                     | [-88, +57]                | [-115, +10]            | [-172, +4]                    | [-125, +22]                  |
| Girl                                | -54 <sup>(0.15)</sup>     | +41 <sup>(0.22)</sup>  | <b>-106<sup>(0.027)</sup></b> | -1 <sup>(0.98)</sup>         |
|                                     | [-127, +19]               | [-108, +25]            | <b>[-199, -12]</b>            | [-77, +75]                   |
| <b>BIRTH LENGTH (cm x100)</b>       |                           |                        |                               |                              |
| Boy                                 | +1 <sup>(0.96)</sup>      | -15 <sup>(0.44)</sup>  | <b>-52<sup>(0.033)</sup></b>  | -26 <sup>(0.27)</sup>        |
|                                     | [-38, +40]                | [-5, +24]              | <b>[-101, -4]</b>             | [-73, +21]                   |
| Girl                                | +1 <sup>(0.97)</sup>      | +4 <sup>(0.82)</sup>   | -5 <sup>(0.074)</sup>         | +14 <sup>(0.53)</sup>        |
|                                     | [-39, +40]                | [-32, +41]             | [-95, +4]                     | [-30, +57]                   |
| <b>HEAD CIRCUMFERENCE (cm x100)</b> |                           |                        |                               |                              |
| Boy                                 | +4 <sup>(0.74)</sup>      | -9 <sup>(0.47)</sup>   | <b>-38<sup>(0.016)</sup></b>  | <b>-35<sup>(0.017)</sup></b> |
|                                     | [-21, +30]                | [-35, +16]             | <b>[-69, -7]</b>              | <b>[-64, -6]</b>             |
| Girl                                | -0 <sup>(0.98)</sup>      | -2 <sup>(0.86)</sup>   | -23 <sup>(0.12)</sup>         | +11 <sup>(0.39)</sup>        |
|                                     | [-24, +23]                | [-23, +19]             | [-53, +6]                     | [-15, +37]                   |
| <b>BMI ((kg/m<sup>2</sup>)x10)</b>  |                           |                        |                               |                              |
| Boy                                 | -0.9 <sup>(0.45)</sup>    | -1.2 <sup>(0.34)</sup> | -2.3 <sup>(0.11)</sup>        | -1.1 <sup>(0.46)</sup>       |
|                                     | [-3.2, +1.4]              | [-0.37, +1.3]          | [-5.2, +0.5]                  | [-4.0, +1.8]                 |
| Girl                                | -1.1 <sup>(0.32)</sup>    | -1.4 <sup>(0.21)</sup> | -2.1 <sup>(0.12)</sup>        | +0.5 <sup>(0.87)</sup>       |
|                                     | [-3.4, +1.1]              | [-3.7, +0.8]           | [-4.8, +0.5]                  | [-2.0, +3.0]                 |

<sup>a</sup>Adjusted for maternal education, partner smoked in pregnancy, gestation of study child and the amount the mother smoked

[N.B. the data for birth length and head circumference are given in cm x 100 so as to aid viewing]

## STROBE Statement—checklist of items that should be included in reports of observational studies

|                              | Item No | Recommendation                                                                                                                                                                                                                                                                                                                                                                                                                                                                                                                                                                                                                                                                                   |
|------------------------------|---------|--------------------------------------------------------------------------------------------------------------------------------------------------------------------------------------------------------------------------------------------------------------------------------------------------------------------------------------------------------------------------------------------------------------------------------------------------------------------------------------------------------------------------------------------------------------------------------------------------------------------------------------------------------------------------------------------------|
| <b>Title and abstract</b>    | 1       | (a) Indicate the study's design with a commonly used term in the title or the abstract<br>(b) Provide in the abstract an informative and balanced summary of what was done and what was found                                                                                                                                                                                                                                                                                                                                                                                                                                                                                                    |
| <b>Introduction</b>          |         |                                                                                                                                                                                                                                                                                                                                                                                                                                                                                                                                                                                                                                                                                                  |
| Background/rationale         | 2       | Explain the scientific background and rationale for the investigation being reported                                                                                                                                                                                                                                                                                                                                                                                                                                                                                                                                                                                                             |
| Objectives                   | 3       | State specific objectives, including any prespecified hypotheses                                                                                                                                                                                                                                                                                                                                                                                                                                                                                                                                                                                                                                 |
| <b>Methods</b>               |         |                                                                                                                                                                                                                                                                                                                                                                                                                                                                                                                                                                                                                                                                                                  |
| Study design                 | 4       | Present key elements of study design early in the paper                                                                                                                                                                                                                                                                                                                                                                                                                                                                                                                                                                                                                                          |
| Setting                      | 5       | Describe the setting, locations, and relevant dates, including periods of recruitment, exposure, follow-up, and data collection                                                                                                                                                                                                                                                                                                                                                                                                                                                                                                                                                                  |
| Participants                 | 6       | (a) <i>Cohort study</i> —Give the eligibility criteria, and the sources and methods of selection of participants. Describe methods of follow-up<br><i>Case-control study</i> —Give the eligibility criteria, and the sources and methods of case ascertainment and control selection. Give the rationale for the choice of cases and controls<br><i>Cross-sectional study</i> —Give the eligibility criteria, and the sources and methods of selection of participants<br>(b) <i>Cohort study</i> —For matched studies, give matching criteria and number of exposed and unexposed<br><i>Case-control study</i> —For matched studies, give matching criteria and the number of controls per case |
| Variables                    | 7       | Clearly define all outcomes, exposures, predictors, potential confounders, and effect modifiers. Give diagnostic criteria, if applicable                                                                                                                                                                                                                                                                                                                                                                                                                                                                                                                                                         |
| Data sources/<br>measurement | 8*      | For each variable of interest, give sources of data and details of methods of assessment (measurement). Describe comparability of assessment methods if there is more than one group                                                                                                                                                                                                                                                                                                                                                                                                                                                                                                             |
| Bias                         | 9       | Describe any efforts to address potential sources of bias                                                                                                                                                                                                                                                                                                                                                                                                                                                                                                                                                                                                                                        |
| Study size                   | 10      | Explain how the study size was arrived at                                                                                                                                                                                                                                                                                                                                                                                                                                                                                                                                                                                                                                                        |
| Quantitative variables       | 11      | Explain how quantitative variables were handled in the analyses. If applicable, describe which groupings were chosen and why                                                                                                                                                                                                                                                                                                                                                                                                                                                                                                                                                                     |
| Statistical methods          | 12      | (a) Describe all statistical methods, including those used to control for confounding<br>(b) Describe any methods used to examine subgroups and interactions<br>(c) Explain how missing data were addressed<br>(d) <i>Cohort study</i> —If applicable, explain how loss to follow-up was addressed<br><i>Case-control study</i> —If applicable, explain how matching of cases and controls was addressed<br><i>Cross-sectional study</i> —If applicable, describe analytical methods taking account of sampling strategy<br>(e) Describe any sensitivity analyses                                                                                                                                |

Continued on next page

**Results**

|                  |     |                                                                                                                                                                                                                                                                                                                                                                                                               |
|------------------|-----|---------------------------------------------------------------------------------------------------------------------------------------------------------------------------------------------------------------------------------------------------------------------------------------------------------------------------------------------------------------------------------------------------------------|
| Participants     | 13* | (a) Report numbers of individuals at each stage of study—eg numbers potentially eligible, examined for eligibility, confirmed eligible, included in the study, completing follow-up, and analysed<br>(b) Give reasons for non-participation at each stage<br>(c) Consider use of a flow diagram                                                                                                               |
| Descriptive data | 14* | (a) Give characteristics of study participants (eg demographic, clinical, social) and information on exposures and potential confounders<br>(b) Indicate number of participants with missing data for each variable of interest<br>(c) <i>Cohort study</i> —Summarise follow-up time (eg, average and total amount)                                                                                           |
| Outcome data     | 15* | <i>Cohort study</i> —Report numbers of outcome events or summary measures over time<br><i>Case-control study</i> —Report numbers in each exposure category, or summary measures of exposure<br><i>Cross-sectional study</i> —Report numbers of outcome events or summary measures                                                                                                                             |
| Main results     | 16  | (a) Give unadjusted estimates and, if applicable, confounder-adjusted estimates and their precision (eg, 95% confidence interval). Make clear which confounders were adjusted for and why they were included<br>(b) Report category boundaries when continuous variables were categorized<br>(c) If relevant, consider translating estimates of relative risk into absolute risk for a meaningful time period |
| Other analyses   | 17  | Report other analyses done—eg analyses of subgroups and interactions, and sensitivity analyses                                                                                                                                                                                                                                                                                                                |

**Discussion**

|                  |    |                                                                                                                                                                            |
|------------------|----|----------------------------------------------------------------------------------------------------------------------------------------------------------------------------|
| Key results      | 18 | Summarise key results with reference to study objectives                                                                                                                   |
| Limitations      | 19 | Discuss limitations of the study, taking into account sources of potential bias or imprecision. Discuss both direction and magnitude of any potential bias                 |
| Interpretation   | 20 | Give a cautious overall interpretation of results considering objectives, limitations, multiplicity of analyses, results from similar studies, and other relevant evidence |
| Generalisability | 21 | Discuss the generalisability (external validity) of the study results                                                                                                      |

**Other information**

|         |    |                                                                                                                                                               |
|---------|----|---------------------------------------------------------------------------------------------------------------------------------------------------------------|
| Funding | 22 | Give the source of funding and the role of the funders for the present study and, if applicable, for the original study on which the present article is based |
|---------|----|---------------------------------------------------------------------------------------------------------------------------------------------------------------|

\*Give information separately for cases and controls in case-control studies and, if applicable, for exposed and unexposed groups in cohort and cross-sectional studies.

**Note:** An Explanation and Elaboration article discusses each checklist item and gives methodological background and published examples of transparent reporting. The STROBE checklist is best used in conjunction with this article (freely available on the Web sites of PLoS Medicine at <http://www.plosmedicine.org/>, Annals of Internal Medicine at <http://www.annals.org/>, and Epidemiology at <http://www.epidem.com/>). Information on the STROBE Initiative is available at [www.strobe-statement.org](http://www.strobe-statement.org).

# BMJ Open

**Is the growth of the child of a smoking mother influenced  
by the  
father's prenatal exposure to tobacco? A hypothesis  
generating  
longitudinal study**

|                                 |                                                                                                                                                                                                                                                                                                                                                                                          |
|---------------------------------|------------------------------------------------------------------------------------------------------------------------------------------------------------------------------------------------------------------------------------------------------------------------------------------------------------------------------------------------------------------------------------------|
| Journal:                        | <i>BMJ Open</i>                                                                                                                                                                                                                                                                                                                                                                          |
| Manuscript ID:                  | bmjopen-2014-005030.R1                                                                                                                                                                                                                                                                                                                                                                   |
| Article Type:                   | Research                                                                                                                                                                                                                                                                                                                                                                                 |
| Date Submitted by the Author:   | 18-Jun-2014                                                                                                                                                                                                                                                                                                                                                                              |
| Complete List of Authors:       | Pembrey, Marcus; University of Bristol, Social and Community Medicine<br>Northstone, Kate; University of Bristol, Centre for Child and Adolescent Health<br>Gregory, Steven; University of Bristol, Social and Community Medicine<br>Miller, Laura; University of Bristol, Social and Community Medicine<br>Golding, Jean; University of Bristol, Centre for Child and Adolescent Health |
| <b>Primary Subject Heading</b>: | Epidemiology                                                                                                                                                                                                                                                                                                                                                                             |
| Secondary Subject Heading:      | Public health                                                                                                                                                                                                                                                                                                                                                                            |
| Keywords:                       | Transgenerational effects, ALSPAC, grandmothers' prenatal smoking, birth head circumference                                                                                                                                                                                                                                                                                              |
|                                 |                                                                                                                                                                                                                                                                                                                                                                                          |

SCHOLARONE™  
Manuscripts

only



1  
2  
3  
4  
5  
6  
7  
8  
9

**Is the growth of the child of a smoking mother influenced by the father's prenatal exposure to tobacco? A hypothesis generating longitudinal study**

10  
11  
12  
13  
14  
15  
16  
17  
18  
19  
20  
21  
22  
23  
24  
25

**Marcus Pembrey<sup>abc</sup>, Kate Northstone<sup>a</sup>, Steven Gregory<sup>ab</sup>, Laura L Miller<sup>a</sup>,**

**Jean Golding<sup>ab</sup>**

**<sup>a</sup>School of Social and Community Medicine, <sup>b</sup>Centre for Child and Adolescent Health, University of Bristol, Bristol and <sup>c</sup>Institute of Child Health, University College London, London, UK**

26  
27  
28  
29

**Key Words:** ALSPAC, transgenerational effects, grandmothers' prenatal smoking, birth head circumference, IQ

30  
31  
32

**Correspondence to:**

33  
34  
35  
36  
37  
38  
39  
40  
41  
42  
43  
44  
45

Professor Jean Golding,  
Centre for Child and Adolescent Health,  
School of Social and Community Medicine,  
Barley House,  
Oakfield Grove  
Bristol BS8 2BN,  
UK

46  
47

Email: [jean.golding@bristol.ac.uk](mailto:jean.golding@bristol.ac.uk)

48  
49

Telephone: +44 (0)117 3310198

Fax: +44 (0)117 3313303

50  
51  
52  
53  
54  
55  
56  
57  
58  
59  
60

**14.5.14**

**Word Count: 3432**

**Abstract**

*Objectives:* Transgenerational effects of different environmental exposures is becoming of major interest, with rodent experiments focusing on epigenetic mechanisms. Previously we have shown that if the study mother is a non-smoker, there is increased mean birth weight, length and body mass index [BMI] in her sons if she herself had been exposed prenatally to her mother's smoking. The aim of this study was to determine whether the prenatal smoke exposure of either parent influenced the growth of the fetus of a smoking woman, and whether any effects were dependent on the fetal sex.

*Design:* Population based pre-birth cohort study.

*Setting:* Avon Longitudinal Study of Parents and Children.

*Participants:* Participants were residents of a geographic area with expected date of delivery between April 1991 and December 1992. Among pregnancies of mothers who smoked during pregnancy, data were available concerning maternal and paternal prenatal exposures to their own mother smoking for 3502 and 2354 respectively

*Primary and secondary outcome measures:*, Birth weight, length, BMI and head circumference.

*Results:* After controlling for confounders, there were no associations with birth weight, length or BMI. There was a strong adjusted association of birth head circumference among boys whose fathers had been exposed prenatally [mean difference -0.35cm; 95%CI -0.57,-0.14; P=0.001]. There was no such association with girls (interaction: P=0.006). Similar associations were found when primiparae and multiparae were analysed separately. In order to determine whether this was reflected in child development, we examined the relationships with IQ; we found that the boys born to exposed fathers had lower IQ scores on average, and that this was particularly due to the verbal component [mean difference in verbal IQ: -3.65; 95%CI -6.60,-0.70 points].

1  
2  
3  
4  
5  
6  
7  
8  
9  
10  
11  
12  
13  
14  
15  
16  
17  
18  
19  
20  
21  
22  
23  
24  
25  
26  
27  
28  
29  
30  
31  
32  
33  
34  
35  
36  
37  
38  
39  
40  
41  
42  
43  
44  
45  
46  
47  
48  
49  
50  
51  
52  
53  
54  
55  
56  
57  
58  
59  
60

*Conclusions:* Head size differences concerning paternal fetal exposure to smoking were unexpected and, as such, should be regarded as hypothesis generating.

For peer review only

### Strengths and limitations of this study

- This study is the first to examine the sex-specific fetal effects of parental prenatal exposure to cigarette smoking when the mother herself smoked during pregnancy.
- Data were collected on a population sample who completed questionnaires blind to the study hypotheses.
- Birth measurements were undertaken using trained staff with repeated validation.
- A variety of sensitivity analyses were undertaken, including separate analyses of primiparae and multiparae, as well as of follow-up of the offspring to determine whether the decrement in birth head circumference was reflected in childhood measurement of IQ. All were in accord with the initial finding.
- The limitation of the study is the failure to obtain comparable data to confirm or negate the study findings.

## INTRODUCTION

Fetal programming via the mother's nutrition and other aspects of her environment is well-recognised as a contributor to adult morbidity and mortality[1] and some of these enduring effects are likely to be mediated by epigenetic mechanisms.[2,3] Studies have shown specific DNA methylation patterns in children whose mothers had smoked during pregnancy.[4-7] However, there have been few pre-conceptional transgenerational studies relating the fetal environment of either parent to the birth outcomes of their own children.

In an earlier study of non-smoking mothers, we found an increase in the birth weight and birth body mass index [BMI] of her sons if she had been exposed *in utero* to her own mothers' smoking, but there was no such effect if the study father had been exposed *in utero*. [8] This lack of paternal influence from his own intrauterine exposure was not unexpected. Indeed, it has been proposed that the paternal line can act as a form of control in studies of maternal effects.[9,10] However, this was not our reason for analysing potential paternal exposure transgenerational effects in our earlier paper[8] or in the present analysis of smoking mothers. They were instigated by studies from Sweden based on samples of individuals born in the town of Överkalix. Their longevity and other health outcomes were linked to detailed historical records of harvests experienced by their ancestors. Although most of the emphasis in the Överkalix study was concerned with exposures in mid-childhood[11,12] the studies of three cohorts pooled together have demonstrated effects of exposures of the paternal grandmother [PGM] prenatally to times of very poor harvests on significantly increased mortality of her granddaughters but not her grandsons.[13] Thus, the presumed effect is from the *in utero* exposure of the paternal grandmother to her son and subsequently to his daughter. Such transgenerational effects are now well supported by rodent experiments showing male-line transmissions and often demonstrating sex-specific

1  
2  
3 transmission on outcomes,[14-17] some focusing on imprinted gene expression in  
4  
5 descendants[18] and others on associated epigenetic changes,[19-21] although no  
6  
7 transgenerational signal itself has been clearly defined.[22]  
8  
9

10 Our earlier transgenerational study of intrauterine exposure of non-smoking mothers  
11  
12 did not consider relationships with fetal growth if the study mother was also a smoker.[8]  
13  
14 Here we use the same cohort, the Avon Longitudinal Study of Parents and Children  
15  
16 [ALSPAC], to investigate the fetal growth of offspring of smoking mothers only – comparing  
17  
18 the offspring of mothers and fathers who were themselves exposed to cigarette smoke *in*  
19  
20 *utero* with those who were not exposed in this way. The only study that we are aware of that  
21  
22 has looked at an aspect of this question compared the birth weight of the grandchildren  
23  
24 comparing those born to mothers who smoked according to whether they themselves had  
25  
26 been exposed to their own mothers' smoking *in utero*. [23] Altogether they reported a  
27  
28 decrease of 70g if the grandmother had also smoked during pregnancy. The authors did not  
29  
30 assess whether this difference was merely a function of variation in the amount smoked by  
31  
32 the study mother. Nor did they assess whether there was any effect discernible with the  
33  
34 prenatal smoke exposure of the study father, or whether there was any difference between the  
35  
36 effects depending on the sex of the offspring.  
37  
38  
39  
40  
41  
42  
43

44 The current study was therefore carried out to assess whether there is indeed a  
45  
46 reduction in the growth of the fetus of a smoking mother if her own mother smoked, and/or  
47  
48 whether exposure of the father *in utero* has any effect on the growth of the child of the  
49  
50 smoking mother. In line with the evidence of the accumulating transgenerational human and  
51  
52 animal data outlined above, we hypothesise that any effects will differ between boy and girl  
53  
54 infants.  
55  
56  
57  
58  
59  
60

## METHODS

### Study sample

The data used in these analyses were collected as part of the Avon Longitudinal Study of Parents and Children (ALSPAC), which was designed to assess the ways in which the environment interacts with the genotype to influence health and development.[24] Pregnant women, resident in the study area in south-west England with an expected date of delivery between 1<sup>st</sup> April 1991 and 31<sup>st</sup> December 1992, were invited to take part. About 80% of the eligible population did so.[25]

Information collected from the study parents during their study pregnancy included details of the maternal and paternal grandparents. Figure 1 illustrates the two pathways of possible influence of parental prenatal exposure to cigarette smoke on the study child that we investigate in this paper.

**Figure 1.** Diagram of intergenerational linkage, where MGM = maternal grandmother; PGM = paternal grandmother

### The exposures

The women and their partners were sent a number of questionnaires during pregnancy.[26] These elicited information on their current smoking habits and those of their parents (i.e. the study grandparents). If they reported that their mothers had smoked, they were asked whether their mothers had smoked when expecting them – and, if so, were given the responses: yes / no / don't know from which to select. Thus the parents who replied 'don't know', had a mother who smoked but the parent was unsure whether she had smoked during her pregnancy. We have analysed these data in two ways: (a) assuming that all these women did smoke during pregnancy, and (b) omitting the 'don't knows' from the analyses and only analysing those definitely reported as smoking during the study pregnancy [this we have

1  
2  
3 treated as a sensitivity analysis]. All mothers who themselves did not smoke during the study  
4 pregnancy were excluded from these analyses. Consequently we compared two groups of  
5 grandchildren: those whose grandmothers had smoked during the pregnancy resulting in their  
6 parent and whose mothers had also smoked during the pregnancy that resulted in the study  
7 child [MGM+M+ and PGM+M+] with those whose grandmothers had not smoked [MGM-  
8 M+ and PGM-M+] respectively. In these analyses all study mothers smoked during  
9 pregnancy. Analyses of fetal growth measures took account of the highest amount smoked by  
10 the mother during the study pregnancy, grouped as <10; 10-19; 20+ per day.  
11  
12  
13  
14  
15  
16  
17  
18  
19  
20  
21  
22

### 23 **Possible confounders**

24  
25 Other data used in the analyses include the study mother's parity (as ascertained  
26 from the maternal report of previous pregnancies resulting in either a live- or still-birth, and  
27 coded as 0; 1+); gestation (completed weeks: 39+; 37-38; ≤36); mother's partner smoking at  
28 the start of pregnancy (primarily reported by the partner, but maternal report was used if the  
29 partner report was missing: yes; no); maternal age at the birth of the child (continuous);  
30 housing tenure as a measure of socioeconomic background (owned or mortgaged; rented  
31 public housing; all other), maternal education (highest level of educational attainment – in  
32 five levels of increasing achievement), maternal alcohol consumption when the mother first  
33 felt the baby move (not at all; <1 glass per week; and one or more glasses per week).  
34  
35  
36  
37  
38  
39  
40  
41  
42  
43  
44  
45  
46  
47

### 48 **Outcome measures**

49 At delivery the baby was weighed to the nearest gram; ALSPAC study staff visited  
50 the two main delivery hospitals each day and measured the crown-heel length and head  
51 circumference of available infants in a standardised manner.<sup>24</sup> Body mass index (BMI) was  
52 calculated as birth weight/length<sup>2</sup> (g/m<sup>2</sup>). In this study we have used BMI, rather than  
53  
54  
55  
56  
57  
58  
59  
60



1  
2  
3 ponderal index (PI) as our measure of adiposity at birth; although it is traditional to use PI at  
4  
5 birth, there is little literature to justify this. It has been suggested that the criteria used to  
6  
7 choose whether to use PI or BMI should be a measure that is independent of length.[27] We  
8  
9 have assessed which of the two measures is independent of length at each gestation among  
10  
11 ALSPAC births and found that BMI satisfies the independence requirement more closely  
12  
13 than PI.[8]  
14

15  
16 Pilot studies before the start of the ALSPAC study had demonstrated that it was  
17  
18 usually the student midwife who was given the task of measuring the circumference of the  
19  
20 baby's head; she tended to have had little or no training and the measurements made were  
21  
22 grossly inaccurate. For this study we only used measurements that were made by our own  
23  
24 staff, after detailed training and with repeated validation over time..  
25  
26  
27  
28

### 29 **Statistical analyses**

30  
31 Multivariable linear regression models assessed the study children's adjusted mean  
32  
33 birth weight, crown-heel length, head circumference and BMI by parental prenatal smoking  
34  
35 exposure. All models were adjusted for parity, maternal education, amount mother smoked,  
36  
37 paternal smoking in pregnancy and gestation with MGM-M+ (and PGM-M+) as the reference  
38  
39 categories. Additional models adjusted for maternal age, housing tenure and maternal alcohol  
40  
41 use as well as maternal birth weight.  
42  
43  
44  
45  
46

### 47 **Sensitivity analyses**

48  
49 In order to determine consistency of the findings, separate analyses were undertaken  
50  
51 for primiparae and multiparae. In order to determine whether the head circumference results  
52  
53 were biologically meaningful, we also used the fact that reduced head circumference is  
54  
55 associated with lower levels of childhood IQ.[28] Childhood IQ was assessed by trained  
56  
57  
58  
59  
60

1  
2  
3 psychologists at age 8 years (56.2% of eligible children attended), with an abbreviated form  
4  
5 of the Wechsler Intelligence Scale for Children (WISC-III).[29] This abbreviated form has  
6  
7 been shown to be a valid method for use in research studies.[30]  
8  
9

## 11 RESULTS

14 In all, there were 3502 births to smoking mothers for whom data were available as to  
15  
16 whether their own mothers had smoked when expecting them [Table 1]. Approximately half  
17  
18 had such a history. Fewer women had information about the prenatal exposures of the father  
19  
20 of their study child [n= 2354], but again exposure was approximately 50:50.  
21  
22  
23  
24  
25  
26  
27  
28  
29  
30  
31  
32  
33  
34  
35  
36  
37  
38  
39  
40  
41  
42  
43  
44  
45  
46  
47  
48  
49  
50  
51  
52  
53  
54  
55  
56  
57  
58  
59  
60

**Table 1. The study sample of mothers who smoked during pregnancy**

|                                                                       | MGM+        | MGM-        | PGM+        | PGM-        |
|-----------------------------------------------------------------------|-------------|-------------|-------------|-------------|
| <b>No. in study</b>                                                   | <b>1781</b> | <b>1721</b> | <b>1209</b> | <b>1145</b> |
| <i>Maternal smoking in pregnancy (cigarettes per day)<sup>a</sup></i> |             |             |             |             |
| <10                                                                   | 500 (28.0)  | 699 (40.6)  | 402 (33.3)  | 460 (40.2)  |
| 10-19                                                                 | 811 (45.6)  | 698 (40.6)  | 524 (43.3)  | 475 (41.5)  |
| 20+                                                                   | 469 (26.4)  | 324 (18.8)  | 283 (23.4)  | 209 (18.3)  |
|                                                                       | P < 0.001   |             | P < 0.001   |             |
| <i>Parity<sup>a</sup></i>                                             |             |             |             |             |
| 0                                                                     | 747 (43.3)  | 779 (46.1)  | 511 (43.3)  | 537 (47.8)  |
| 1+                                                                    | 980 (56.8)  | 910 (53.9)  | 668 (56.7)  | 586 (52.2)  |
|                                                                       | P = 0.092   |             | P = 0.031   |             |
| <i>Maternal education level<sup>a</sup></i>                           |             |             |             |             |
| CSE or less                                                           | 598 (39.6)  | 399 (26.3)  | 362 (33.8)  | 284 (27.6)  |
| Vocational                                                            | 195 (12.9)  | 184 (12.2)  | 144 (13.5)  | 126 (12.3)  |
| O Level                                                               | 493 (32.6)  | 548 (36.2)  | 367 (34.3)  | 357 (34.7)  |
| A Level                                                               | 181 (12.0)  | 291 (19.2)  | 156 (14.6)  | 195 (19.0)  |
| Degree                                                                | 45 (3.0)    | 93 (6.1)    | 41 (3.8)    | 66 (6.4)    |
|                                                                       | P < 0.001   |             | P < 0.001   |             |
| <i>Gestation(weeks)<sup>a</sup></i>                                   |             |             |             |             |
| 39+                                                                   | 1328 (75.1) | 1279 (74.6) | 860 (71.5)  | 868 (75.9)  |
| 37/38                                                                 | 305 (17.3)  | 312 (18.2)  | 249 (20.7)  | 197 (17.2)  |
| <37                                                                   | 135 (7.6)   | 123 (7.2)   | 94 (7.8)    | 78 (6.8)    |
|                                                                       | P = 0.070   |             | P = 0.048   |             |
| <i>Partner smoking<sup>a</sup></i>                                    |             |             |             |             |
| No                                                                    | 478 (29.7)  | 487 (30.3)  | 341 (28.3)  | 344 (30.0)  |
| Yes                                                                   | 1130 (70.3) | 1120 (69.7) | 863 (71.7)  | 801 (70.0)  |
|                                                                       | P = 0.072   |             | P = 0.360   |             |
| <i>Housing tenure<sup>a</sup></i>                                     |             |             |             |             |
| Owned/mortgaged                                                       | 736 (44.5)  | 965 (59.1)  | 583 (50.9)  | 677 (61.8)  |
| nted public                                                           | 628 (38.0)  | 406 (24.9)  | 386 (33.7)  | 247 (22.5)  |
| Rented private/other                                                  | 291 (17.6)  | 263 (16.1)  | 177 (15.5)  | 172 (15.7)  |
|                                                                       | P < 0.001   |             | P < 0.001   |             |
| <i>Maternal alcohol<sup>a</sup></i>                                   |             |             |             |             |
| Never                                                                 | 870 (50.9)  | 827 (49.6)  | 602 (51.7)  | 566 (51.5)  |
| <1 glass per week                                                     | 563 (32.9)  | 530 (31.8)  | 376 (32.3)  | 348 (31.6)  |
| 1+ glasses per week                                                   | 277 (16.2)  | 311 (18.7)  | 186 (16.0)  | 186 (16.9)  |
|                                                                       | P = 0.170   |             | P = 0.830   |             |
| <i>Maternal age (yr)<sup>b</sup></i>                                  |             |             |             |             |
|                                                                       | 25.8 (5.1)  | 26.8 (5.1)  | 26.1 (5.1)  | 26.8 (5.0)  |
|                                                                       | P < 0.001   |             | P = 0.003   |             |
| <i>Maternal birthweight (kg)<sup>b</sup></i>                          |             |             |             |             |
|                                                                       | 3.12 (0.67) | 3.32 (0.63) | 3.20 (0.65) | 3.22 (0.67) |
|                                                                       | P < 0.001   |             | P = 0.570   |             |

<sup>a</sup> n(%); <sup>b</sup> mean (SD); MGM maternal grandmother; PGM paternal grandmother; + smoked in pregnancy; - did not smoke in pregnancy

1  
2  
3 Comparison of data concerning the potential confounders [Table 1] indicates that if  
4  
5 either grandmother had smoked prenatally, then the smoking study mother herself was more  
6  
7 likely to be a heavy smoker, to have had lower educational attainment and to be younger; in  
8  
9 addition the family was more likely to be living in rented public housing. Not surprisingly,  
10  
11 the women who had been exposed in utero (i.e. MGM+) had considerably lower mean birth  
12  
13 weight themselves (by 199g) than those not exposed (MGM-). There was no difference in  
14  
15 prevalence of smoking by the study father if his own mother had smoked during pregnancy.  
16  
17  
18  
19

20  
21 Table 2 compares the birth measurements of study children born to parents who had  
22  
23 been exposed to smoking *in utero*. It can be seen that for the women who had themselves  
24  
25 been exposed *in utero*, there was just one statistically significant unadjusted association in  
26  
27 their progeny (a lower birth weight for girls), but that this was no longer significant upon  
28  
29 adjustment. For paternal *in utero* exposure, however, there were several unadjusted  
30  
31 associations [with girls' birth weight and birth length, and with boys' birth length and head  
32  
33 circumference]. On adjustment, the association with head circumference remained with a  
34  
35 0.35cm reduction [95% CI -0.57, -0.14] for boys [P = 0.001], but the association for girls was  
36  
37 quite different: +0.08 [95%CI -0.11, +0.28]; (P for interaction = 0.006).  
38  
39  
40  
41  
42  
43  
44  
45  
46  
47  
48  
49  
50  
51  
52  
53  
54  
55  
56  
57  
58  
59  
60

**Table 2. Mean difference (P value) [95% CI] in birth measurements of children born to smoking mothers, comparing those where the child's grandmother had smoked with those who had not**

|                                     | <b>MGM+ M+ v. MGM- M+</b> |                             | <b>PGM+ M+ v. PGM- M+</b> |                             |
|-------------------------------------|---------------------------|-----------------------------|---------------------------|-----------------------------|
|                                     | <b>Unadjusted</b>         | <b>Adjusted<sup>a</sup></b> | <b>Unadjusted</b>         | <b>Adjusted<sup>a</sup></b> |
| <b>BIRTHWEIGHT (g)</b>              |                           |                             |                           |                             |
| Boy                                 | -13 <sup>(0.65)</sup>     | -29 <sup>(0.24)</sup>       | -55 <sup>(0.11)</sup>     | -50 <sup>(0.074)</sup>      |
|                                     | [-69, +43]                | [-77, +19]                  | [-123, +13]               | [-104, +5]                  |
| Girl                                | -63 <sup>(0.022)</sup>    | -31 <sup>(0.22)</sup>       | -88 <sup>(0.010)</sup>    | -11 <sup>(0.28)</sup>       |
|                                     | [-116, -9]                | [-81, +18]                  | [-155, -22]               | [-67, +45]                  |
| <b>BIRTH LENGTH (cm x100)</b>       |                           |                             |                           |                             |
| Boy                                 | +8 <sup>(0.59)</sup>      | -0 <sup>(1.00)</sup>        | -37 <sup>(0.035)</sup>    | -29 <sup>(0.070)</sup>      |
|                                     | [-20, +36]                | [-28, +28]                  | [-72, -3]                 | [-61, +3]                   |
| Girl                                | -11 <sup>(0.44)</sup>     | +7 <sup>(0.59)</sup>        | -37 <sup>(0.037)</sup>    | +1 <sup>(0.96)</sup>        |
|                                     | [-39, +17]                | [-20, +35]                  | [-71, -2]                 | [-31, +33]                  |
| <b>HEAD CIRCUMFERENCE (cm x100)</b> |                           |                             |                           |                             |
| Boy                                 | +4 <sup>(0.66)</sup>      | -3 <sup>(0.74)</sup>        | -35 <sup>(0.003)</sup>    | -35 <sup>(0.001)</sup>      |
|                                     | [-14, +23]                | [-22, +16]                  | [-59, -12]                | [-57, -14]                  |
| Girl                                | -9 <sup>(0.28)</sup>      | -3 <sup>(0.76)</sup>        | -17 <sup>(0.107)</sup>    | +8 <sup>(0.39)</sup>        |
|                                     | [-27, +8]                 | [-19, +14]                  | [-39, +4]                 | [-11, +28]                  |
| <b>BMI ((kg/m<sup>2</sup>)*10)</b>  |                           |                             |                           |                             |
| Boy                                 | -0.3 <sup>(0.73)</sup>    | -0.8 <sup>(0.37)</sup>      | -1.2 <sup>(0.24)</sup>    | -1.0 <sup>(0.31)</sup>      |
|                                     | [-1.9, +1.3]              | [-2.5, +0.9]                | [-3.1, +0.8]              | [-2.9, +0.9]                |
| Girl                                | -1.8 <sup>(0.41)</sup>    | -1.3 <sup>(0.15)</sup>      | -2.1 <sup>(0.056)</sup>   | -0.6 <sup>(0.57)</sup>      |
|                                     | [-3.5, -0.1]              | [-3.1, +0.5]                | [-4.2, +0.1]              | [-2.6, +1.5]                |

<sup>a</sup>Adjusted for maternal parity, maternal education, partner smoked in pregnancy, gestational length at birth of study child and the amount the mother smoked

[N.B. the data for birth length and head circumference are given in cm x 100 so as to aid viewing]

### Sensitivity analyses

The analyses were repeated for primiparae and multiparae separately [Supplementary Tables 1 and 2]. The only significant association that remained after adjustment concerned the head circumference of the study sons. The effect sizes were similar for each parity group: for primiparae the effect size was -0.34 [95%CI -0.66, -0.02]cm,  $P = 0.036$ ; for multiparae the adjusted effect size was similar at -0.35 [95% CI -0.64, -0.06]cm,  $P = 0.017$ . Again there were significant interactions with the sex of the child.

Since this association with head circumference was consistent but unexpected, and since there is evidence that birth head circumference is associated with childhood IQ,[30] we used the same study methodology to assess whether a similar association was apparent between paternal prenatal exposure and childhood IQ. Table 3 demonstrates that there was indeed a reduction in adjusted mean IQ of 2.90 points [95% CI -5.72, -0.08] ( $P = 0.044$ ) for sons of exposed fathers, but no such association for daughters, although the interaction with sex was not statistically significant. Full scale IQ is made up of the sum of two components [performance IQ and verbal IQ] that are, in general, known to have different genetic and environmental components.[31] We therefore have analysed the data to assess whether the associations with paternal grandmothers' smoking during pregnancy are associated with one of these components in particular. We found that paternal exposure *in utero* had a greater effect on his son's verbal IQ [mean adjusted difference -3.65 points; 95% CI -6.60, -0.70], but with little difference in performance IQ [mean -1.40 [95% CI -4.39, +1.60] points.

**Table 3. Mean difference [95% CI] in birth measurements of children born to smoking mothers, comparing those where the child's grandmother had smoked with those who had not.**

|                       | MGM+M+ v. MGM-M+      |                       | PGM+M+ v. PGM-M+      |                       |
|-----------------------|-----------------------|-----------------------|-----------------------|-----------------------|
|                       | Unadjusted            | Adjusted <sup>a</sup> | Unadjusted            | Adjusted <sup>a</sup> |
| <b>Total IQ</b>       |                       |                       |                       |                       |
| Boys                  | <b>-3.87</b>          | -2.45                 | <b>-4.00</b>          | <b>-2.90</b>          |
| 95% CI                | <b>[-6.34, -1.40]</b> | [-4.96, +0.07]        | <b>[-6.92, -1.08]</b> | <b>[-5.72, -0.08]</b> |
| P value               | <b>0.002</b>          | 0.057                 | <b>0.007</b>          | <b>0.044</b>          |
| Number                | 694                   | 612                   | 507                   | 482                   |
| Girls                 | <b>-2.50</b>          | -0.40                 | <b>-3.03</b>          | -1.36                 |
| 95% CI                | <b>[-4.90, -0.11]</b> | [-2.85, +2.05]        | <b>[-5.78, -0.28]</b> | [-4.07, +1.36]        |
| P value               | <b>0.041</b>          | 0.749                 | <b>0.031</b>          | 0.327                 |
| Number                | 617                   | 551                   | 456                   | 436                   |
| <b>Performance IQ</b> |                       |                       |                       |                       |
| Boys                  | <b>-2.64</b>          | -1.48                 | -2.44                 | -1.40                 |
| 95% CI                | <b>[-5.20, -0.08]</b> | [-4.20, +1.24]        | [-5.40, +0.50]        | [-4.39, +1.60]        |
| P value               | <b>0.043</b>          | 0.287                 | 0.104                 | 0.360                 |
| Number                | 698                   | 616                   | 510                   | 485                   |
| Girls                 | -2.46                 | -0.50                 | <b>-3.03</b>          | -1.74                 |
| 95% CI                | [-5.01, +0.09]        | [-3.19, +2.19]        | <b>[-5.88, -0.18]</b> | [-4.69, +1.20]        |
| P value               | 0.059                 | 0.716                 | <b>0.037</b>          | 0.245                 |
| N                     | 619                   | 552                   | 457                   | 436                   |
| <b>Verbal IQ</b>      |                       |                       |                       |                       |
| Boys                  | <b>-3.75</b>          | -2.40                 | <b>-4.73</b>          | <b>-3.65</b>          |
| 95% CI                | <b>[-6.30, -1.21]</b> | [-5.00, +1.20]        | <b>[-7.81, -1.66]</b> | <b>[-6.60, -0.70]</b> |
| P value               | <b>0.004</b>          | 0.070                 | <b>0.003</b>          | <b>0.015</b>          |
| Number                | 697                   | 615                   | 509                   | 484                   |
| Girls                 | -1.98                 | -0.15                 | -2.48                 | -0.81                 |
| 95% CI                | [-4.37, +0.42]        | [-2.60, +2.30]        | [-5.28, +0.32]        | [-3.54, +1.92]        |
| P value               | 0.106                 | 0.906                 | 0.082                 | 0.561                 |
| Number                | 617                   | 551                   | 456                   | 436                   |

<sup>a</sup>Adjusted for maternal education, parity, partner smoked in pregnancy, gestational length at birth of study child and the amount the mother smoked.

## DISCUSSION

We investigated whether the parents' exposure *in utero* to their own mothers' smoking was associated with differences in fetal growth among women who smoked in pregnancy, and showed an association between paternal *in utero* exposure and a reduced head circumference in his sons, but not in his daughters. This was an unexpected finding. A series of sensitivity analyses showed the effect to be almost identical in children born to primiparae and to those born to multiparae. We assessed whether there was confirmatory evidence of an impact on brain size by looking at the IQ of the children. We found a significant reduction in total IQ in 8-year-old boys (but not girls) whose paternal grandmother smoked during the pregnancy resulting in the study child's father. The IQ effect size was similar in both parity groups and was still present when birth head circumference was taken into account [data not shown]. We showed a stronger association with verbal IQ than performance IQ. To our knowledge there have been no previous studies that have considered any effects of paternal exposure to smoking *in utero* on his offspring.

### Strengths and limitations

There are a number of limitations to this study: (i) Details of smoking of parents and grandparents depend on parental self-report – however there is considerable information to indicate that adults are unlikely to lie about smoking habits, especially when using anonymised self-completion questionnaires;<sup>[32]</sup> here we have shown that the mean birth weight of the study mothers who had reported that their own mothers had smoked when they were *in utero* was 199g lower than that of those who had reported that their mother did not smoke at that time, which was about the expected order of difference if the mothers had reported accurately; (ii) although the amount the parents smoked was reported, there was no



1  
2  
3 estimate requested for the amount smoked by the grandmothers when pregnant with the study  
4  
5 parent – this may have been associated with the outcome, but it is difficult to postulate how  
6  
7 such effects might differ between the sexes of the study children; (iii) although the ALSPAC  
8  
9 study is large, the numbers of women who smoked throughout pregnancy and for whom  
10  
11 details are available on the grandmothers' smoking are reduced and consequently the  
12  
13 statistical power is relatively low. Among the strengths of this study are the following: (a) it  
14  
15 tested a prior hypothesis that early life exposures can have phenotypic effects down the  
16  
17 paternal line with sex-specific outcomes; (b) the information on grandparental and parental  
18  
19 smoking was collected prior to the birth of the study child, and consequently cannot have  
20  
21 been biased by knowledge of fetal size; (c) birth length and head circumference were  
22  
23 ascertained by trained measurers using standard techniques, as opposed to the generally  
24  
25 inaccurate methods used in most delivery units; (d) IQ was measured using standard  
26  
27 methodology by trained psychologists; (e) the study was based on a relatively large  
28  
29 population sample, and results are therefore likely to be generalisable.  
30  
31  
32  
33  
34  
35

### 36 **Meaning of the study**

37  
38 Our parallel study of non-smoking mothers looked at the effect of parental exposure  
39  
40 *in utero*; we found the sons were larger at birth (both in regard to birth weight and birth BMI)  
41  
42 if the maternal grandmother had smoked in the pregnancy that resulted in the study mother.  
43  
44 There was no discernible effect of paternal prenatal exposure on the study child's birth  
45  
46 weight or BMI; however there was a slight *increase* in head circumference among the boys  
47  
48 born to fathers who had been exposed *in utero* [mean difference +0.08 cm; 95% CI -0.03,  
49  
50 +0.19].[8]  
51  
52  
53  
54  
55  
56  
57  
58  
59  
60

1  
2  
3           Attributing the smaller head circumference in boys of smoking mothers to the prenatal  
4 exposure of the father through his own mother's smoking, raises the question of possible  
5 mechanisms. How might the information be transmitted via his sperm or in some other way?  
6  
7 As we noted in the introduction to this paper there is increasing evidence that exposures,  
8 especially in early life, can lead to enduring changes in the epigenome that, in turn, can  
9 modify gene expression. Whilst transgenerational epigenetic inheritance remains  
10 controversial, at least in humans,[33] the phenomenon of genomic imprinting establishes the  
11 principle that epigenetic marks such as DNA methylation placed in one generation can  
12 influence gene expression in the next. One such imprinted gene is the Insulin Growth Factor  
13 2 (*IGF2*) which is expressed only from the paternally-derived chromosome 11, the maternal  
14 copy being epigenetically silenced. *IGF2* encodes an endocrine and autocrine/paracrine  
15 acting factor important in directing growth during prenatal development.[34,35] Maternal  
16 smoking has been shown to be associated with a 5% higher DNA methylation level at the  
17 *IGF2* DMR (differentially methylated region) in the newborn infant,[5] and interestingly in  
18 the context of our study, this methylation shift is specific to male offspring. Thus it is  
19 possible that the study father's *IGF2* DMR had been epigenetically modified (including in his  
20 fetal testes) by his mother's smoking throughout pregnancy. Furthermore it is plausible that  
21 this epigenetic state could be transmitted via his sperm to the study offspring. Imprinted gene  
22 regions tend to escape the usual widespread erasure of DNA methylation from the paternally-  
23 derived genome in the pre-implantation embryo soon after fertilisation.[36] In support of  
24 paternal effects generally, there is a report of hypomethylation at the *IGF2* DMR in umbilical  
25 cord blood being associated with paternal obesity suggesting a preconceptional impact of the  
26 obesity (and/or exposures related to it) on the reprogramming of imprint marks during  
27 spermatogenesis.[37]

**In conclusion**

When the mother is a smoker, we found no effect of her own tobacco exposure *in utero* on the fetal growth of her children. However, when the mother is a smoker, paternal exposure *in utero* is associated with a reduced head circumference at birth and IQ at 8 years in sons, but not daughters. We had no prior hypothesis that head circumference would be associated, particularly among sons, so these results must be considered as hypothesis generating, and require testing in further longitudinal data sets.

## Acknowledgements

We are extremely grateful to all the families who took part in this study, the midwives for their help in recruiting them, and the whole ALSPAC team, which includes interviewers, computer and laboratory technicians, clerical workers, research scientists, volunteers, managers, receptionists and nurses.

**Contributors:** MP and JG had the idea; KN, SG and LLM carried out the statistical analyses; JG and MP wrote the first draft and all authors contributed to the final manuscript.

**Funding:** The UK Medical Research Council (MRC), the Wellcome Trust and the University of Bristol currently provide core support for ALSPAC. The statistical analyses for this paper were undertaken with funding from the Medical Research Council (grant no. G1100226). The funders had no role in study design, data collection, statistical analysis, decision to publish, or preparation of the manuscript.

**Competing interests:** The authors have no competing interests.

## Ethics approval

Ethical approval for the ALSPAC study was obtained from the ALSPAC Law and Ethics Committee and the three Avon-based Local Research Ethics Committees: Bristol and Weston Health Authority: E1808 Children of the Nineties; Avon Longitudinal Study of Pregnancy and Childhood (ALSPAC) (28<sup>th</sup> November 1989). Southmead Health Authority: 49/89 Children of the Nineties - "ALSPAC" (5<sup>th</sup> April 1990). Frenchay Health Authority: 90/8 Children of the Nineties. (28<sup>th</sup> June 1990). Written consent was obtained for all assays of biological samples. Ethics Committees considered voluntarily returned postal questionnaires as implied consent.

1  
2  
3  
4  
5  
6  
7  
8  
9  
10  
11  
12  
13  
14  
15  
16  
17  
18  
19  
20  
21  
22  
23  
24  
25  
26  
27  
28  
29  
30  
31  
32  
33  
34  
35  
36  
37  
38  
39  
40  
41  
42  
43  
44  
45  
46  
47  
48  
49  
50  
51  
52  
53  
54  
55  
56  
57  
58  
59  
60

**Data sharing:** ALSPAC is committed to share data with bona fide researchers. See the study website for the conditions of use and access procedures:

<http://www.bristol.ac.uk/alspac/researchers/>

For peer review only

## References

1. Barker DJ. In utero programming of chronic disease. *Clin Sci* 1998;**95**:115-128.
2. Gluckman PD, Hanson MA, Buklijas T, et al. Epigenetic mechanisms that underpin metabolic and cardiovascular disease. *Nat Rev Endocrinol* 2009;**5**:401- 408.  
doi:10.1038/nrendo.2009.102
3. Relton C, Davey-Smith G, Ozanne S. Developmental Epigenetic Programming in Diabetes and Obesity. In: Jirtle R, Tyson E, eds. *Environmental Epigenomics in Health and Disease; Epigenetics and Complex Diseases*. Berlin Heidelberg: Springer 2013:235-253.
4. Breton CV, Byun HM, Wenten M, et al. Prenatal tobacco smoke exposure affects global and gene-specific DNA methylation. *Am J Respir Crit Care Med* 2009;**180**:462-467. Doi. 10.1164/rccm.200901-0135OC
5. Murphy SK, Adigun A, Huang Z, et al. Gender-specific methylation differences in relation to prenatal exposure to cigarette smoke. *Gene* 2012;**15**:36-43.  
doi.org/10.1016/j.gene.2011.11.062.
6. Joubert BR, Håberg SE, Nilsen RM, et al. 450K epigenome-wide scan identifies differential DNA methylation in newborns related to maternal smoking during pregnancy. *Environ Health Perspect* 2012;**120**:1425-1431. 10.1289/ehp.1205412.
7. Lee KKW, Pausova Z. Cigarette smoking and DNA methylation. *Front Genet* 2013;**4**:132.  
doi: 10.3389/fgene.2013.00132
8. Miller LL, Pembrey M, Davey Smith G, et al. Is the growth of the fetus of a non-smoking mother influenced by the smoking of either grandmother while pregnant? *PLoS ONE* 2014;  
9(2): e86781. doi:10.1371/journal.pone.0086781.

- 1  
2  
3 9. Davey Smith G. Assessing intrauterine influences on offspring outcomes: Can  
4 epidemiological studies yield robust outcomes? *Basic Clin Pharmacol Toxicol* 2008;**102**:245-  
5 256. DOI: 10.1111/j.1742-7843.2007.00191.x  
6  
7  
8  
9  
10 10. Macdonald-Wallis C, Tobias JH, Davey Smith G, et al. Parental smoking during  
11 pregnancy and offspring bone mass at age 10 years: findings from a prospective birth cohort.  
12 *Osteoporos Int* 2011; **22**:1809-1819. Doi: 10.1007/s00198-010-1415-y  
13  
14  
15  
16  
17 11. Bygren LO, Kaati G, Edvinsson S. Longevity determined by ancestors' over nutrition  
18 during their slow growth period. *Acta Biotheor* 2001;**49**:53-59. Doi.  
19 10.1023/A:1010241825519  
20  
21  
22  
23  
24  
25 12. Kaati G, Bygren LO, Edvinsson S. Cardiovascular and diabetes mortality determined by  
26 nutrition during parents' and grandparents' slow growth period. *Eur J Hum Genet*  
27 2002;**10**:682-688. DOI:10.1038/sj.ejhg.5200859  
28  
29  
30  
31  
32 13. Pembrey ME, Bygren LO, Kaati G et al. Sex-specific, male-line transgenerational  
33 responses in humans. *Eur J Hum Genet* 2006;**14**:159–166. doi:10.1038/sj.ejhg.5201538  
34  
35  
36  
37  
38 14. Anway MD, Cupp AS, Uzumcu M, et al. Epigenetic transgenerational actions of  
39 endocrine disruptors and male fertility. *Science* 2005;**308**:1466-1469. DOI:  
40 10.1126/science.1108190  
41  
42  
43  
44 15. Franklin TB, Russig H, Weiss IC et al. Epigenetic transmission of the impact of early  
45 stress across generations. *Biol Psychiatr* 2010;**68**:408-  
46 415.doi10.1016/j.biopsych.2010.05.036  
47  
48  
49  
50  
51 16. Ng SF, Lin RC, Laybutt DR et al. Chronic high-fat diet in fathers programs  $\beta$ -cell  
52 dysfunction in female rat offspring. *Nature* 2010;**467**:963-966. doi:10.1038/nature09491  
53  
54  
55  
56 17. Zeybel M, Hardy T, Wong YK, et al. Multigenerational epigenetic adaptation of the  
57 hepatic wound-healing response. *Nat Med* 2012;**18**:1369–1377. doi:10.1038/nm.2893  
58  
59  
60

- 1  
2  
3 18. Dunn GA, Bale TL. Maternal high-fat diet effects on third-generation female body size  
4  
5 via the paternal lineage. *Endocrinol* 2011;**152**:2228-2236. Doi:10.1210/en.2010.1461  
6  
7  
8 19. Burdge GC, Slater-Jefferies J, Torrens C, et al. Dietary protein restriction of pregnant rats  
9  
10 in the F0 generation induces altered methylation of hepatic gene promoters in the adult male  
11  
12 offspring in the F1 and F2 generations. *Br J Nutr* 2007;**97**:435-439. Doi  
13  
14 10.1017/S0007114507352392  
15  
16 20. Carone BR, Fauquier L, Habib N, et al. Paternally induced transgenerational  
17  
18 environmental reprogramming of metabolic gene expression in mammals. *Cell*  
19  
20 2010;**143**:1084-1096. Doi:10.1016/j.cell.2010.12.008  
21  
22  
23 21. Dias BG, Ressler KJ. Parental olfactory experience influences behavior and neural  
24  
25 structure in subsequent generations. *Nat Neurosci* 2014;**17**:89-96. Doi: doi:10.1038/nn.3594  
26  
27  
28  
29 22. Daxinger L, Whitelaw E. Understanding transgenerational epigenetic inheritance via the  
30  
31 gametes in mammals. *Nat Rev Genet* 2012;**31**:153-162. doi:10.1038/nrg3188  
32  
33  
34 23. Misra DP, Astone N, Lynch CD. Maternal smoking and birth weight: interaction with  
35  
36 parity and mother's own in utero exposure to smoking. *Epidemiol* 2005;**16**:288-293. doi:  
37  
38 10.1097/01.ede.0000158198.59544.cf  
39  
40 24. Golding J, Pembrey M, Jones R. ALSPAC—the Avon Longitudinal Study of Parents and  
41  
42 Children. I. Study methodology. *Paediatr Perinatal Epidemiol* 2001;**15**:74-87. DOI:  
43  
44 10.1046/j.1365-3016.2001.00325.x  
45  
46  
47 25. Boyd A, Golding J, Macleod J, et al. Cohort Profile: The 'Children of the 90s'—the index  
48  
49 offspring of the Avon Longitudinal Study of Parents and Children. *Int J Epidemiol*  
50  
51 2012;**42**:111-127. doi. 10.1093/ije/dys064  
52  
53  
54 26. ALSPAC web: [http://www.bristol.ac.uk/alspac/researchers/resources-available/data-  
57  
58  
59  
60](http://www.bristol.ac.uk/alspac/researchers/resources-available/data-<br/>55<br/>56 details/questionnaires/) details/questionnaires/. Accessed 2 December 2013.



- 1  
2  
3 27. Cole TJ, Henson GL, Tremble JM, et al. Birthweight for length: ponderal index, body  
4 mass index or Benn index? *Ann Hum Biol* 1997;**24**:289–298.  
5  
6 doi:10.1080/03014469700005032  
7  
8  
9  
10 28. Gale CR, O'Callaghan FJ, Bredow M, et al. The influence of head growth in fetal life,  
11 infancy, and childhood on intelligence at the ages of 4 and 8 years. *Pediatr* 2006;**118**:1486-  
12 1492. doi: 10.1542/peds.2005-2629  
13  
14  
15 29. Wechsler D, Golombok S, Rust J. WISC-IIIUK Wechsler Intelligence Scale for Children.  
16 Sidcup, UK: Psychological Corp 1992.  
17  
18  
19  
20 30. Gunnell D, Miller LL, Rogers I, et al. Association of Insulin-like Growth Factor I and  
21 Insulin-like Growth Factor–Binding Protein-3 With Intelligence Quotient Among 8-to 9-  
22 Year-Old Children in the Avon Longitudinal Study of Parents and Children. *Pediatr* 2005;  
23 **116**:e681-e686. doi: 10.1542/peds.2004-2390  
24  
25  
26  
27  
28  
29  
30 31. Dickens WT, Flynn JR. Heritability estimates versus large environmental effects: the IQ  
31 paradox resolved. *Psychol Rev* 2001;**108**:346. Doi:10.1037/0033-295X.108.2.346  
32  
33  
34  
35 32. Klebanoff MA, Levine RJ, Clemens JD, et al. Serum cotinine concentration and self-  
36 reported smoking during pregnancy. *Am J Epidemiol* 1998;**148**:259-262.  
37  
38  
39  
40 33. Grossniklaus U, Kelly B, Ferguson-Smith AC, et al. Transgenerational epigenetic  
41 inheritance: how important is it? *Nat Rev Genet* 2013;**14**:228-235. doi:10.1038/nrg3435  
42  
43  
44 34. LeRoith D, Lowe WL. Growth factors. In: Melmed S, Conn PM, eds. *Endocrinology:*  
45 *Basic and Clinical Principles*, 2<sup>nd</sup> edition. Totowa, New Jersey: Humana Press 2005:85-91.  
46  
47  
48 35. Demetriou C, Abu-Amero S, Thomas AC, et al. Paternally expressed, imprinted Insulin-  
49 1 like growth factor-2 in chorionic villi correlates significantly with birth weight. *PLoS ONE*  
50 2014;doi:10.1371/journal.pone.0085454.  
51  
52  
53  
54  
55  
56  
57  
58  
59  
60

1  
2  
3 36. Seisenberger S, Peat JR, Hore TA, et al. Reprogramming DNA methylation in the  
4 mammalian life cycle: building and breaking epigenetic barriers. *Philos Trans R Soc Lond B*  
5 *Biol Sci* 2013;**368**: 20110330. doi: 10.1098/rstb.2011.0330.  
6  
7  
8

9  
10 37. Soubry A, Schildkraut JM, Murtha A, et al. Paternal obesity is associated with IGF2  
11 hypomethylation in newborns: results from a Newborn Epigenetics Study (NEST) cohort.  
12 *BMC Med* 2013;29:doi:10.1186/1741-7015-11-29  
13  
14  
15  
16  
17  
18  
19  
20  
21  
22  
23  
24  
25  
26  
27  
28  
29  
30  
31  
32  
33  
34  
35  
36  
37  
38  
39  
40  
41  
42  
43  
44  
45  
46  
47  
48  
49  
50  
51  
52  
53  
54  
55  
56  
57  
58  
59  
60

1  
2  
3  
4  
5  
6  
7  
8  
9 **Is the growth of the child of a smoking mother influenced by the father's**  
10 **prenatal exposure to tobacco? A hypothesis generating longitudinal study**  
11

12 **Marcus Pembrey<sup>abc</sup>, Kate Northstone<sup>a</sup>, Steven Gregory<sup>ab</sup>, Laura L Miller<sup>a</sup>,**

13  
14  
15 **Jean Golding<sup>ab</sup>**  
16  
17

18  
19 <sup>a</sup>School of Social and Community Medicine, <sup>b</sup>Centre for Child and Adolescent Health,  
20 University of Bristol, Bristol and <sup>c</sup>Institute of Child Health, University College London,  
21 London, UK  
22  
23

24  
25  
26 **Key Words:** ALSPAC, transgenerational effects, grandmothers' prenatal smoking, birth  
27 head circumference, IQ  
28

29  
30 **Correspondence to:**  
31

32  
33 Professor Jean Golding,  
34 Centre for Child and Adolescent Health,  
35 School of Social and Community Medicine,  
36 Barley House,  
37 Oakfield Grove  
38 Bristol BS8 2BN,  
39 UK  
40  
41  
42

43  
44 Email: [jean.golding@bristol.ac.uk](mailto:jean.golding@bristol.ac.uk)

45  
46 Telephone: +44 (0)117 3310198

47 Fax: +44 (0)117 3313303

48  
49 **14.55.2.14**

50 **Word Count: 3432**  
51  
52  
53  
54  
55  
56  
57  
58  
59  
60

**Abstract**

*Objectives:* Transgenerational effects of different environmental exposures is becoming of major interest, with rodent experiments focusing on epigenetic mechanisms. Previously we have shown that if the study mother is a non-smoker, there is increased mean birth weight, length and body mass index [BMI] in her sons if she herself had been exposed prenatally to her mother's smoking. The aim of this study was to determine whether the prenatal smoke exposure of either parent influenced the growth of the fetus of a smoking woman, and whether any effects were dependent on the fetal sex.

*Design:* Population based pre-birth cohort study.

*Setting:* Avon Longitudinal Study of Parents and Children.

*Participants:* Participants were residents of a geographic area with expected date of delivery between April 1991 and December 1992. Among pregnancies of mothers who smoked during pregnancy, data were available concerning maternal and paternal prenatal exposures to their own mother smoking for 3502 and 2354 respectively

*Primary and secondary outcome measures:*, Birth weight, length, BMI and head circumference.

*Results:* After controlling for confounders, there were no associations with birth weight, length or BMI. There was a strong adjusted association of birth head circumference among boys whose fathers had been exposed prenatally [mean difference -0.35cm; 95%CI -0.57,-0.14; P=0.001]. There was no such association with girls (interaction: P=0.006). Similar associations were found when primiparae and multiparae were analysed separately. In order to determine whether this was reflected in child development, we examined the relationships with IQ; we found that the boys born to exposed fathers had lower IQ scores on average, and that this was particularly due to the verbal component [mean difference in verbal IQ: -3.65; 95%CI -6.60,-0.70 points].

1  
2  
3  
4  
5  
6  
7  
8  
9  
10  
11  
12  
13  
14  
15  
16  
17  
18  
19  
20  
21  
22  
23  
24  
25  
26  
27  
28  
29  
30  
31  
32  
33  
34  
35  
36  
37  
38  
39  
40  
41  
42  
43  
44  
45  
46  
47  
48  
49  
50  
51  
52  
53  
54  
55  
56  
57  
58  
59  
60

3

*Conclusions:* Head size differences concerning paternal fetal exposure to smoking were unexpected and, as such, should be regarded as hypothesis generating.

For peer review only

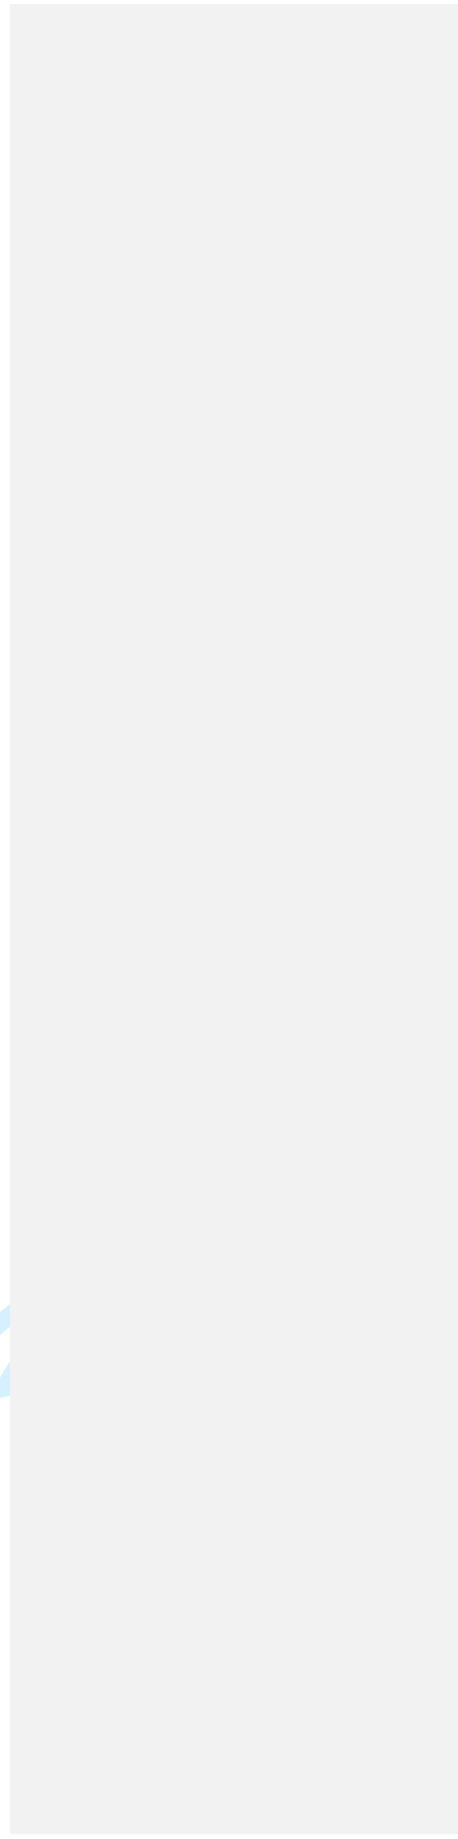

### Strengths and limitations of this study

- This study is the first to examine the sex-specific fetal effects of parental prenatal exposure to cigarette smoking when the mother herself smoked during pregnancy.
- Data were collected on a population sample who completed questionnaires blind to the study hypotheses.
- Birth measurements were undertaken using trained staff with repeated validation.
- A variety of sensitivity analyses were undertaken, including separate analyses of primiparae and multiparae, as well as of follow-up of the offspring to determine whether the decrement in birth head circumference was reflected in childhood measurement of IQ. All were in accord with the initial finding.
- The limitation of the study is the failure to obtain comparable data to confirm or negate the study findings.

~~**Funding:** The UK Medical Research Council ([www.mrc.ac.uk](http://www.mrc.ac.uk)), the Wellcome Trust ([www.Wellcome.ac.uk](http://www.Wellcome.ac.uk)) and the University of Bristol ([www.bristol.ac.uk](http://www.bristol.ac.uk)) currently provide core support for ALSPAC. The statistical analyses for this project were undertaken with funding from the Medical Research Council [grant no. G1100226]. The funders had no role in study design, data collection, statistical analysis, decision to publish, or preparation of the manuscript.~~

~~**Competing interests:** The authors have no competing interests.~~

## INTRODUCTION

Fetal programming via the mother's nutrition and other aspects of her environment is well-recognised as a contributor to adult morbidity and mortality[1] and some of these enduring effects are likely to be mediated by epigenetic mechanisms.[2,3] Studies have shown specific DNA methylation patterns in children whose mothers had smoked during pregnancy.[4-7] However, there have been few pre-conceptional transgenerational studies relating the fetal environment of either parent to the birth outcomes of their own children.

In an earlier study of non-smoking mothers, we found an increase in the birth weight and birth body mass index [BMI] of her sons if she had been exposed *in utero* to her own mothers' smoking, but there was no such effect if the study father had been exposed *in utero*. [8] This lack of paternal influence from his own intrauterine exposure was not unexpected. Indeed, it has been proposed that the paternal line can act as a form of control in studies of maternal effects. [9,10] However, this was not our reason for analysing potential paternal exposure transgenerational effects in our earlier paper [8] or in the present analysis of smoking mothers. They were instigated by studies from Sweden based on samples of individuals born in the town of Överkalix. Their longevity and other health outcomes were linked to detailed historical records of harvests experienced by their ancestors. Although most of the emphasis in the Överkalix study was concerned with exposures in mid-childhood [11,12] the studies of three cohorts pooled together have demonstrated effects of exposures of the paternal grandmother [PGM] prenatally to times of very poor harvests on significantly increased mortality of her granddaughters but not her grandsons. [13] Thus, the presumed effect is from the *in utero* exposure of the paternal grandmother to her son and subsequently to his daughter. Such transgenerational effects are now well supported by rodent experiments showing male-line transmissions and often demonstrating sex-specific

1  
2  
3  
4  
5  
6  
7 transmission on outcomes,[14-17] some focusing on imprinted gene expression in  
8 descendants[18] and others on associated epigenetic changes,[19-21] although no  
9 transgenerational signal itself has been clearly defined.[22]  
10  
11

12  
13 Our earlier transgenerational study of intrauterine exposure of non-smoking mothers  
14 did not consider relationships with fetal growth if the study mother was also a smoker.[8]  
15 Here we use the same cohort, the Avon Longitudinal Study of Parents and Children  
16 [ALSPAC], to investigate the fetal growth of offspring of smoking mothers only – comparing  
17 the offspring of mothers and fathers who were themselves exposed to cigarette smoke *in*  
18 *utero* with those who were not exposed in this way. The only study that we are aware of that  
19 has looked at an aspect of this question compared the birth weight of the grandchildren  
20 comparing those born to mothers who smoked according to whether they themselves had  
21 been exposed to their own mothers' smoking *in utero*. [23] Altogether they reported a  
22 decrease of 70g if the grandmother had also smoked during pregnancy. The authors did not  
23 assess whether this difference was merely a function of variation in the amount smoked by  
24 the study mother. Nor did they assess whether there was any effect discernible with the  
25 prenatal smoke exposure of the study father, or whether there was any difference between the  
26 effects depending on the sex of the offspring.  
27  
28  
29  
30  
31  
32  
33  
34  
35  
36  
37  
38  
39  
40  
41

42 The current study was therefore carried out to assess whether there is indeed a  
43 reduction in the growth of the fetus of a smoking mother if her own mother smoked, and/or  
44 whether exposure of the father in utero has any effect on the growth of the child of the  
45 smoking mother. In line with the evidence of the accumulating transgenerational human and  
46 animal data outlined above, we hypothesise that any effects will differ between boy and girl  
47 infants.  
48  
49  
50  
51  
52  
53  
54  
55  
56  
57  
58  
59  
60



## METHODS

### ~~Ethics statement~~

~~Ethical approval for the ALSPAC study was obtained from the ALSPAC Law and Ethics Committee and the three Avon based Local Research Ethics Committees: Bristol and Weston Health Authority: E1808 Children of the Nineties: Avon Longitudinal Study of Pregnancy and Childhood (ALSPAC) (28<sup>th</sup> November 1989). Southmead Health Authority: 49/89 Children of the Nineties "ALSPAC" (5<sup>th</sup> April 1990). Frenchay Health Authority: 90/8 Children of the Nineties. (28<sup>th</sup> June 1990). Written consent was obtained for all assays of biological samples. Ethics Committees considered voluntarily returned postal questionnaires as implied consent.~~

### Study sample

The data used in these analyses were collected as part of the Avon Longitudinal Study of Parents and Children (ALSPAC), which was designed to assess the ways in which the environment interacts with the genotype to influence health and development.[24] Pregnant women, resident in the study area in south-west England with an expected date of delivery between 1<sup>st</sup> April 1991 and 31<sup>st</sup> December 1992, were invited to take part. About 80% of the eligible population did so.[25]

Information collected from the study parents during their study pregnancy included details of the maternal and paternal grandparents. Figure 1 illustrates the two pathways of possible influence of parental prenatal exposure to cigarette smoke on the study child that we investigate in this paper.

**Figure 1.** Diagram of intergenerational linkage, where MGM = maternal grandmother; PGM = paternal grandmother

### The exposures

The women and their partners were sent a number of questionnaires during pregnancy.[26] These elicited information on their current smoking habits and those of their parents (i.e. the study grandparents). If they reported that their mothers had smoked, they were asked whether their mothers had smoked when expecting them – and, if so, were given the responses: yes / no / don't know from which to select. Thus the parents who replied 'don't know', had a mother who smoked but the parent was unsure whether she had smoked during her pregnancy. We have analysed these data in two ways: (a) assuming that all these women did smoke during pregnancy, and (b) omitting the 'don't know' from the analyses and only analysing those definitely reported as smoking during the study pregnancy [this we have treated as a sensitivity analysis]. All mothers who themselves did not smoke during the study pregnancy were excluded from these analyses. Consequently we compared two groups of grandchildren: those whose grandmothers had smoked during the pregnancy resulting in their parent and whose mothers had also smoked during the pregnancy that resulted in the study child [MGM+M+ and PGM+M+] with those whose grandmothers had not smoked [MGM-M+ and PGM-M+] respectively. In these analyses all study mothers smoked during pregnancy. Analyses of fetal growth measures took account of the highest amount smoked by the mother during the study pregnancy, grouped as <10; 10-19; 20+ per day.

### Possible confounders

Other data used in the analyses include the study mother's parity (as ascertained from the maternal report of previous pregnancies resulting in either a live- or still-birth, and coded as 0; 1+); gestation (completed weeks: 39+; 37-38; ≤36); mother's partner smoking at the start of pregnancy (primarily reported by the partner, but maternal report was used if the partner report was missing: yes; no); maternal age at the birth of the child (continuous);

housing tenure as a measure of socioeconomic background (owned or mortgaged; rented public housing; all other), maternal education (highest level of educational attainment – in five levels of increasing achievement), maternal alcohol consumption when the mother first felt the baby move (not at all; <1 glass per week; and one or more glasses per week).

### Outcome measures

At delivery the baby was weighed to the nearest gram; ALSPAC study staff visited the two main delivery hospitals each day and measured the crown-heel length and head circumference of available infants in a standardised manner.<sup>24</sup> Body mass index (BMI) was calculated as birth weight/length<sup>2</sup> (g/m<sup>2</sup>). In this study we have used BMI, rather than ponderal index (PI) as our measure of adiposity at birth; although it is traditional to use PI at birth, there is little literature to justify this. It has been suggested that the criteria used to choose whether to use PI or BMI should be a measure that is independent of length.[27] We have assessed which of the two measures is independent of length at each gestation among ALSPAC births and found that BMI satisfies the independence requirement more closely than PI.[8]

Pilot studies before the start of the ALSPAC study had demonstrated that it was usually the student midwife who was given the task of measuring the circumference of the baby's head; she tended to have had little or no training and the measurements made were grossly inaccurate. For this study we only used measurements that were made by our own staff, after detailed training and with repeated validation over time. Detailed studies with accurate data to test the hypothesis raised by the results of this study are needed.

### Statistical analyses

Multivariable linear regression models assessed the study children's adjusted mean birth weight, crown-heel length, head circumference and BMI by parental prenatal smoking exposure. All models were adjusted for parity, maternal education, amount mother smoked, paternal smoking in pregnancy and gestation with MGM-M+ (and PGM-M+) as the reference categories. Additional models adjusted for maternal age, housing tenure and maternal alcohol use as well as maternal birth weight.

### Sensitivity analyses

In order to determine consistency of the findings, separate analyses were undertaken for primiparae and multiparae. In order to determine whether the head circumference results were biologically meaningful, we also used the fact that reduced head circumference is associated with lower levels of childhood IQ.[28] Childhood IQ was assessed by trained psychologists at age 8 years (56.2% of eligible children attended), with an abbreviated form of the Wechsler Intelligence Scale for Children (WISC-III).[29] This abbreviated form has been shown to be a valid method for use in research studies.[30]

## RESULTS

In all, there were 3502 births to smoking mothers for whom data were available as to whether their own mothers had smoked when expecting them [Table 1]. Approximately half had such a history. Fewer women had information about the prenatal exposures of the father of their study child [n= 2354], but again exposure was approximately 50:50.

**Table 1. The study sample of mothers who smoked during pregnancy**

|                                                                       | MGM+        | MGM-        | PGM+        | PGM-        |
|-----------------------------------------------------------------------|-------------|-------------|-------------|-------------|
| <b>No. in study</b>                                                   | <b>1781</b> | <b>1721</b> | <b>1209</b> | <b>1145</b> |
| <i>Maternal smoking in pregnancy (cigarettes per day)<sup>a</sup></i> |             |             |             |             |
| <10                                                                   | 500 (28.0)  | 699 (40.6)  | 402 (33.3)  | 460 (40.2)  |
| 10-19                                                                 | 811 (45.6)  | 698 (40.6)  | 524 (43.3)  | 475 (41.5)  |
| 20+                                                                   | 469 (26.4)  | 324 (18.8)  | 283 (23.4)  | 209 (18.3)  |
|                                                                       | P < 0.001   |             | P < 0.001   |             |
| <i>Parity<sup>a</sup></i>                                             |             |             |             |             |
| 0                                                                     | 747 (43.3)  | 779 (46.1)  | 511 (43.3)  | 537 (47.8)  |
| 1+                                                                    | 980 (56.8)  | 910 (53.9)  | 668 (56.7)  | 586 (52.2)  |
|                                                                       | P = 0.092   |             | P = 0.031   |             |
| <i>Maternal education level<sup>a</sup></i>                           |             |             |             |             |
| CSE or less                                                           | 598 (39.6)  | 399 (26.3)  | 362 (33.8)  | 284 (27.6)  |
| Vocational                                                            | 195 (12.9)  | 184 (12.2)  | 144 (13.5)  | 126 (12.3)  |
| O Level                                                               | 493 (32.6)  | 548 (36.2)  | 367 (34.3)  | 357 (34.7)  |
| A Level                                                               | 181 (12.0)  | 291 (19.2)  | 156 (14.6)  | 195 (19.0)  |
| Degree                                                                | 45 (3.0)    | 93 (6.1)    | 41 (3.8)    | 66 (6.4)    |
|                                                                       | P < 0.001   |             | P < 0.001   |             |
| <i>Gestation(weeks)<sup>a</sup></i>                                   |             |             |             |             |
| 39+                                                                   | 1328 (75.1) | 1279 (74.6) | 860 (71.5)  | 868 (75.9)  |
| 37/38                                                                 | 305 (17.3)  | 312 (18.2)  | 249 (20.7)  | 197 (17.2)  |
| <37                                                                   | 135 (7.6)   | 123 (7.2)   | 94 (7.8)    | 78 (6.8)    |
|                                                                       | P = 0.070   |             | P = 0.048   |             |
| <i>Partner smoking<sup>a</sup></i>                                    |             |             |             |             |
| No                                                                    | 478 (29.7)  | 487 (30.3)  | 341 (28.3)  | 344 (30.0)  |
| Yes                                                                   | 1130 (70.3) | 1120 (69.7) | 863 (71.7)  | 801 (70.0)  |
|                                                                       | P = 0.072   |             | P = 0.360   |             |
| <i>Housing tenure<sup>a</sup></i>                                     |             |             |             |             |
| Owned/mortgaged                                                       | 736 (44.5)  | 965 (59.1)  | 583 (50.9)  | 677 (61.8)  |
| nted public                                                           | 628 (38.0)  | 406 (24.9)  | 386 (33.7)  | 247 (22.5)  |
| Rented private/other                                                  | 291 (17.6)  | 263 (16.1)  | 177 (15.5)  | 172 (15.7)  |
|                                                                       | P < 0.001   |             | P < 0.001   |             |
| <i>Maternal alcohol<sup>a</sup></i>                                   |             |             |             |             |
| Never                                                                 | 870 (50.9)  | 827 (49.6)  | 602 (51.7)  | 566 (51.5)  |
| <1 glass per week                                                     | 563 (32.9)  | 530 (31.8)  | 376 (32.3)  | 348 (31.6)  |
| 1+ glasses per week                                                   | 277 (16.2)  | 311 (18.7)  | 186 (16.0)  | 186 (16.9)  |
|                                                                       | P = 0.170   |             | P = 0.830   |             |
| <i>Maternal age (yr)<sup>b</sup></i>                                  |             |             |             |             |
|                                                                       | 25.8 (5.1)  | 26.8 (5.1)  | 26.1 (5.1)  | 26.8 (5.0)  |
|                                                                       | P < 0.001   |             | P = 0.003   |             |
| <i>Maternal birthweight (kg)<sup>b</sup></i>                          |             |             |             |             |
|                                                                       | 3.12 (0.67) | 3.32 (0.63) | 3.20 (0.65) | 3.22 (0.67) |
|                                                                       | P < 0.001   |             | P = 0.570   |             |

<sup>a</sup> n(%); <sup>b</sup> mean (SD); MGM maternal grandmother; PGM paternal grandmother; + smoked in pregnancy; - did not smoke in pregnancy

1  
2  
3  
4  
5  
6  
7  
8  
9  
10  
11  
12  
13  
14  
15  
16  
17  
18  
19  
20  
21  
22  
23  
24  
25  
26  
27  
28  
29  
30  
31  
32  
33  
34  
35  
36  
37  
38  
39  
40  
41  
42  
43  
44  
45  
46  
47  
48  
49  
50  
51  
52  
53  
54  
55  
56  
57  
58  
59  
60

Comparison of data concerning the potential confounders [Table 1] indicates that if either grandmother had smoked prenatally, then the smoking study mother herself was more likely to be a heavy smoker, to have had lower educational attainment and to be younger; in addition the family was more likely to be living in rented public housing. Not surprisingly, the women who had been exposed in utero (i.e. MGM+) had considerably lower mean birth weight themselves (by 199g) than those not exposed (MGM-). There was no difference in prevalence of smoking by the study father if his own mother had smoked during pregnancy.

Table 2 compares the birth measurements of study children born to parents who had been exposed to smoking *in utero*. It can be seen that for the women who had themselves been exposed *in utero*, there was just one statistically significant unadjusted association in their progeny (a lower birth weight for girls), but that this was no longer significant upon adjustment. For paternal *in utero* exposure, however, there were several unadjusted associations [with girls' birth weight and birth length, and with boys' birth length and head circumference]. On adjustment, the association with head circumference remained with a 0.35cm reduction [95% CI -0.57, -0.14] for boys [P = 0.001], but the association for girls was quite different: +0.08 [95%CI -0.11, +0.28]; (P for interaction = 0.006).

**Table 2. Mean difference (P value) [95% CI] in birth measurements of children born to smoking mothers, comparing those where the child's grandmother had smoked with those who had not**

|                                     | <b>MGM+ M+ v. MGM- M+</b>    |                             | <b>PGM+ M+ v. PGM- M+</b>    |                              |
|-------------------------------------|------------------------------|-----------------------------|------------------------------|------------------------------|
|                                     | <b>Unadjusted</b>            | <b>Adjusted<sup>a</sup></b> | <b>Unadjusted</b>            | <b>Adjusted<sup>a</sup></b>  |
| <b>BIRTHWEIGHT (g)</b>              |                              |                             |                              |                              |
| Boy                                 | -13 <sup>(0.65)</sup>        | -29 <sup>(0.24)</sup>       | -55 <sup>(0.11)</sup>        | -50 <sup>(0.074)</sup>       |
|                                     | [-69, +43]                   | [-77, +19]                  | [-123, +13]                  | [-104, +5]                   |
| Girl                                | <b>-63<sup>(0.022)</sup></b> | -31 <sup>(0.22)</sup>       | <b>-88<sup>(0.010)</sup></b> | -11 <sup>(0.28)</sup>        |
|                                     | <b>[-116, -9]</b>            | [-81, +18]                  | <b>[-155, -22]</b>           | [-67, +45]                   |
| <b>BIRTH LENGTH (cm x100)</b>       |                              |                             |                              |                              |
| Boy                                 | +8 <sup>(0.59)</sup>         | -0 <sup>(1.00)</sup>        | <b>-37<sup>(0.035)</sup></b> | -29 <sup>(0.070)</sup>       |
|                                     | [-20, +36]                   | [-28, +28]                  | <b>[-72, -3]</b>             | [-61, +3]                    |
| Girl                                | -11 <sup>(0.44)</sup>        | +7 <sup>(0.59)</sup>        | <b>-37<sup>(0.037)</sup></b> | +1 <sup>(0.96)</sup>         |
|                                     | [-39, +17]                   | [-20, +35]                  | <b>[-71, -2]</b>             | [-31, +33]                   |
| <b>HEAD CIRCUMFERENCE (cm x100)</b> |                              |                             |                              |                              |
| Boy                                 | +4 <sup>(0.66)</sup>         | -3 <sup>(0.74)</sup>        | <b>-35<sup>(0.003)</sup></b> | <b>-35<sup>(0.001)</sup></b> |
|                                     | [-14, +23]                   | [-22, +16]                  | <b>[-59, -12]</b>            | <b>[-57, -14]</b>            |
| Girl                                | -9 <sup>(0.28)</sup>         | -3 <sup>(0.76)</sup>        | -17 <sup>(0.107)</sup>       | +8 <sup>(0.39)</sup>         |
|                                     | [-27, +8]                    | [-19, +14]                  | [-39, +4]                    | [-11, +28]                   |
| <b>BMI ((kg/m<sup>2</sup>)*10)</b>  |                              |                             |                              |                              |
| Boy                                 | -0.3 <sup>(0.73)</sup>       | -0.8 <sup>(0.37)</sup>      | -1.2 <sup>(0.24)</sup>       | -1.0 <sup>(0.31)</sup>       |
|                                     | [-1.9, +1.3]                 | [-2.5, +0.9]                | [-3.1, +0.8]                 | [-2.9, +0.9]                 |
| Girl                                | -1.8 <sup>(0.41)</sup>       | -1.3 <sup>(0.15)</sup>      | -2.1 <sup>(0.056)</sup>      | -0.6 <sup>(0.57)</sup>       |
|                                     | [-3.5, -0.1]                 | [-3.1, +0.5]                | [-4.2, +0.1]                 | [-2.6, +1.5]                 |

<sup>a</sup>Adjusted for maternal parity, maternal education, partner smoked in pregnancy, gestational length at birth of study child and the amount the mother smoked

[N.B. the data for birth length and head circumference are given in cm x 100 so as to aid viewing]

### Sensitivity analyses

The analyses were repeated for primiparae and multiparae separately [Supplementary Tables 1 and 2]. The only significant association that remained after adjustment concerned the head circumference of the study sons. The effect sizes were similar for each parity group: for primiparae the effect size was -0.34 [95%CI -0.66, -0.02]cm,  $P = 0.036$ ; for multiparae the adjusted effect size was similar at -0.35 [95% CI -0.64, -0.06]cm,  $P = 0.017$ . Again there were significant interactions with the sex of the child.

Since this association with head circumference was consistent but unexpected, and since there is evidence that birth head circumference is associated with childhood IQ,[30] we used the same study methodology to assess whether a similar association was apparent between paternal prenatal exposure and childhood IQ. Table 3 demonstrates that there was indeed a reduction in adjusted mean IQ of 2.90 points [95% CI -5.72, -0.08] ( $P = 0.044$ ) for sons of exposed fathers, but no such association for daughters, although the interaction with sex was not statistically significant. Full scale IQ is made up of the sum of two components [performance IQ and verbal IQ] that are, in general, known to have different genetic and environmental components.[31] We therefore have analysed the data to assess whether the associations with paternal grandmothers' smoking during pregnancy are associated with one of these components in particular. We found that paternal exposure *in utero* had a greater effect on his son's verbal IQ [mean adjusted difference -3.65 points; 95% CI -6.60, -0.70], but with little difference in performance IQ [mean -1.40 [95% CI -4.39, +1.60] points.



**Table 3. Mean difference [95% CI] in birth measurements of children born to smoking mothers, comparing those where the child's grandmother had smoked with those who had not.**

|                       | MGM+M+ v. MGM-M+      |                       | PGM+M+ v. PGM-M+      |                       |
|-----------------------|-----------------------|-----------------------|-----------------------|-----------------------|
|                       | Unadjusted            | Adjusted <sup>a</sup> | Unadjusted            | Adjusted <sup>a</sup> |
| <b>Total IQ</b>       |                       |                       |                       |                       |
| Boys                  | <b>-3.87</b>          | -2.45                 | <b>-4.00</b>          | <b>-2.90</b>          |
| 95% CI                | <b>[-6.34, -1.40]</b> | [-4.96, +0.07]        | <b>[-6.92, -1.08]</b> | <b>[-5.72, -0.08]</b> |
| P value               | <b>0.002</b>          | 0.057                 | <b>0.007</b>          | <b>0.044</b>          |
| Number                | 694                   | 612                   | 507                   | 482                   |
| Girls                 | <b>-2.50</b>          | -0.40                 | <b>-3.03</b>          | -1.36                 |
| 95% CI                | <b>[-4.90, -0.11]</b> | [-2.85, +2.05]        | <b>[-5.78, -0.28]</b> | [-4.07, +1.36]        |
| P value               | <b>0.041</b>          | 0.749                 | <b>0.031</b>          | 0.327                 |
| Number                | 617                   | 551                   | 456                   | 436                   |
| <b>Performance IQ</b> |                       |                       |                       |                       |
| Boys                  | <b>-2.64</b>          | -1.48                 | -2.44                 | -1.40                 |
| 95% CI                | <b>[-5.20, -0.08]</b> | [-4.20, +1.24]        | [-5.40, +0.50]        | [-4.39, +1.60]        |
| P value               | <b>0.043</b>          | 0.287                 | 0.104                 | 0.360                 |
| Number                | 698                   | 616                   | 510                   | 485                   |
| Girls                 | -2.46                 | -0.50                 | <b>-3.03</b>          | -1.74                 |
| 95% CI                | [-5.01, +0.09]        | [-3.19, +2.19]        | <b>[-5.88, -0.18]</b> | [-4.69, +1.20]        |
| P value               | 0.059                 | 0.716                 | <b>0.037</b>          | 0.245                 |
| N                     | 619                   | 552                   | 457                   | 436                   |
| <b>Verbal IQ</b>      |                       |                       |                       |                       |
| Boys                  | <b>-3.75</b>          | -2.40                 | <b>-4.73</b>          | <b>-3.65</b>          |
| 95% CI                | <b>[-6.30, -1.21]</b> | [-5.00, +1.20]        | <b>[-7.81, -1.66]</b> | <b>[-6.60, -0.70]</b> |
| P value               | <b>0.004</b>          | 0.070                 | <b>0.003</b>          | <b>0.015</b>          |
| Number                | 697                   | 615                   | 509                   | 484                   |
| Girls                 | -1.98                 | -0.15                 | -2.48                 | -0.81                 |
| 95% CI                | [-4.37, +0.42]        | [-2.60, +2.30]        | [-5.28, +0.32]        | [-3.54, +1.92]        |
| P value               | 0.106                 | 0.906                 | 0.082                 | 0.561                 |
| Number                | 617                   | 551                   | 456                   | 436                   |

<sup>a</sup>Adjusted for maternal education, parity, partner smoked in pregnancy, gestational [length at birth](#) of study child and the amount the mother smoked.

## DISCUSSION

We investigated whether the parents' exposure *in utero* to their own mothers' smoking was associated with differences in fetal growth among women who smoked in pregnancy, and showed an association between paternal *in utero* exposure and a reduced head circumference in his sons, but not in his daughters. This was an unexpected finding. A series of sensitivity analyses showed the effect to be almost identical in children born to primiparae and to those born to multiparae. We assessed whether there was confirmatory evidence of an impact on brain size by looking at the IQ of the children. We found a significant reduction in total IQ in 8-year-old boys (but not girls) whose paternal grandmother smoked during the pregnancy resulting in the study child's father. The IQ effect size was similar in both parity groups and was still present when birth head circumference was taken into account [data not shown]. We showed a stronger association with verbal IQ than performance IQ. To our knowledge there have been no previous studies that have considered any effects of paternal exposure to smoking *in utero* on his offspring.

### Strengths and limitations

There are a number of limitations to this study: (i) Details of smoking of parents and grandparents depend on parental self-report – however there is considerable information to indicate that adults are unlikely to lie about smoking habits, especially when using anonymised self-completion questionnaires; [32] here we have shown that the mean birth weight of the study mothers who had reported that their own mothers had smoked when they were *in utero* was 199g lower than that of those who had reported that their mother did not smoke at that time, which was about the expected order of difference if the mothers had reported accurately; (ii) although the amount the parents smoked was reported, there was no

1  
2  
3  
4  
5  
6  
7 estimate requested for the amount smoked by the grandmothers when pregnant with the study  
8 parent – this may have been associated with the outcome, but it is difficult to postulate how  
9 such effects might differ between the sexes of the study children; (iii) although the ALSPAC  
10 study is large, the numbers of women who smoked throughout pregnancy and for whom  
11 details are available on the grandmothers' smoking are reduced and consequently the  
12 statistical power is relatively low. Among the strengths of this study are the following: (a) it  
13 tested a prior hypothesis that early life exposures can have phenotypic effects down the  
14 paternal line with sex-specific outcomes; (b) the information on grandparental and parental  
15 smoking was collected prior to the birth of the study child, and consequently cannot have  
16 been biased by knowledge of fetal size; (c) birth length and head circumference were  
17 ascertained by trained measurers using standard techniques, as opposed to the generally  
18 inaccurate methods used in most delivery units; (d) IQ was measured using standard  
19 methodology by trained psychologists; (e) the study was based on a relatively large  
20 population sample, and results are therefore likely to be generalisable.  
21  
22  
23  
24  
25  
26  
27  
28  
29  
30  
31  
32  
33  
34  
35

### 36 **Meaning of the study**

37  
38 Our ~~previousparallel~~ study of non-smoking mothers, ~~looking~~ at the effect of  
39 parental exposure *in utero*; ~~we~~ found the ~~ir~~ sons were larger at birth (both in regard to birth  
40 weight and birth BMI) if the maternal grandmother had smoked in the pregnancy that resulted  
41 in the study mother. There was no discernible effect of paternal prenatal exposure on the  
42 study child's birth weight or BMI; however there was a slight *increase* in head circumference  
43 among the boys born to fathers who had been exposed *in utero* [mean difference +0.08 cm;  
44 95% CI -0.03, +0.19].[8]  
45  
46  
47  
48  
49  
50  
51  
52  
53  
54  
55  
56  
57  
58  
59  
60

1  
2  
3  
4  
5  
6  
7  
8  
9  
10  
11  
12  
13  
14  
15  
16  
17  
18  
19  
20  
21  
22  
23  
24  
25  
26  
27  
28  
29  
30  
31  
32  
33  
34  
35  
36  
37  
38  
39  
40  
41  
42  
43  
44  
45  
46  
47  
48  
49  
50  
51  
52  
53  
54  
55  
56  
57  
58  
59  
60

Attributing the smaller head circumference in boys of smoking mothers to the prenatal exposure of the father through his own mother's smoking, raises the question of possible mechanisms. How might the information be transmitted via his sperm or in some other way? As we noted in the introduction to this paper there is increasing evidence that exposures, especially in early life, can lead to enduring changes in the epigenome that, in turn, can modify gene expression. Whilst transgenerational epigenetic inheritance remains controversial, at least in humans,[33] the phenomenon of genomic imprinting establishes the principle that epigenetic marks such as DNA methylation placed in one generation can influence gene expression in the next. One such imprinted gene is the Insulin Growth Factor 2 (*IGF2*) which is expressed only from the paternally-derived chromosome 11, the maternal copy being epigenetically silenced. *IGF2* encodes an endocrine and autocrine/paracrine acting factor important in directing growth during prenatal development.[34,35] Maternal smoking has been shown to be associated with a 5% higher DNA methylation level at the *IGF2* DMR (differentially methylated region) in the newborn infant,[5] and interestingly in the context of our study, this methylation shift is specific to male offspring. Thus it is possible that the study father's *IGF2* DMR had been epigenetically modified (including in his fetal testes) by his mother's smoking throughout pregnancy. Furthermore it is plausible that this epigenetic state could be transmitted via his sperm to the study offspring. Imprinted gene regions tend to escape the usual widespread erasure of DNA methylation from the paternally-derived genome in the pre-implantation embryo soon after fertilisation.[36] In support of paternal effects generally, there is a report of hypomethylation at the *IGF2* DMR in umbilical cord blood being associated with paternal obesity suggesting a preconceptional impact of the obesity (and/or exposures related to it) on the reprogramming of imprint marks during spermatogenesis.[37]

### Unanswered questions and further research

~~There are few studies on head circumference at birth. This is possibly because the measurements are generally inaccurate. Pilot studies before the start of the ALSPAC study had demonstrated that it was usually the student midwife who was given the task of measuring the circumference of the baby's head; she tended to have had little or no training and the measurements made were grossly inaccurate. For this study we only used measurements that were made by our own staff, after detailed training and with repeated validation over time. Detailed studies with accurate data to test the hypothesis raised by the results of this study are needed.~~

### In conclusion

When the mother is a smoker, we found no effect of her own tobacco exposure *in utero* on the fetal growth of her children. However, when the mother is a smoker, paternal exposure *in utero* is associated with a reduced head circumference at birth and IQ at 8 years in sons, but not daughters. We had no prior hypothesis that head circumference would be associated, particularly among sons, so these results must be considered as hypothesis generating, and require testing in further longitudinal data sets.

### Acknowledgements

We are extremely grateful to all the families who took part in this study, the midwives for their help in recruiting them, and the whole ALSPAC team, which includes interviewers, computer and laboratory technicians, clerical workers, research scientists, volunteers, managers, receptionists and nurses.

**Authors' contributions:** MP and JG had the idea; KN, SG and LLM carried out the statistical analyses; JG and MP wrote the first draft and all authors contributed to the final manuscript.

**Funding:** [The UK Medical Research Council \(MRC\), the Wellcome Trust and the University of Bristol currently provide core support for ALSPAC. The statistical analyses for this paper were undertaken with funding from the Medical Research Council \(grant no. G1100226\). The funders had no role in study design, data collection, statistical analysis, decision to publish, or preparation of the manuscript.](#)

**Competing interests:** [The authors have no competing interests.](#)

### **Ethics approval**

[Ethical approval for the ALSPAC study was obtained from the ALSPAC Law and Ethics Committee and the three Avon-based Local Research Ethics Committees: Bristol and Weston Health Authority: E1808 Children of the Nineties; Avon Longitudinal Study of Pregnancy and Childhood \(ALSPAC\) \(28<sup>th</sup> November 1989\). Southmead Health Authority: 49/89 Children of the Nineties - "ALSPAC" \(5<sup>th</sup> April 1990\). Frenchay Health Authority: 90/8 Children of the Nineties. \(28<sup>th</sup> June 1990\). Written consent was obtained for all assays of biological samples. Ethics Committees considered voluntarily returned postal questionnaires as implied consent.](#)

**Formatted:** Font: (Default) Times New Roman, 12 pt, Bold

1  
2  
3  
4  
5  
6  
7  
8  
9  
10  
11  
12  
13  
14  
15  
16  
17  
18  
19  
20  
21  
22  
23  
24  
25  
26  
27  
28  
29  
30  
31  
32  
33  
34  
35  
36  
37  
38  
39  
40  
41  
42  
43  
44  
45  
46  
47  
48  
49  
50  
51  
52  
53  
54  
55  
56  
57  
58  
59  
60

21

**Data sharing:** ~~The ALSPAC data can be used by bona fide researchers.~~ ALSPAC is committed to share data with bona fide researchers. See the study website for the conditions of use and access procedures: <http://www.bristol.ac.uk/alspac/researchers/>

For peer review only

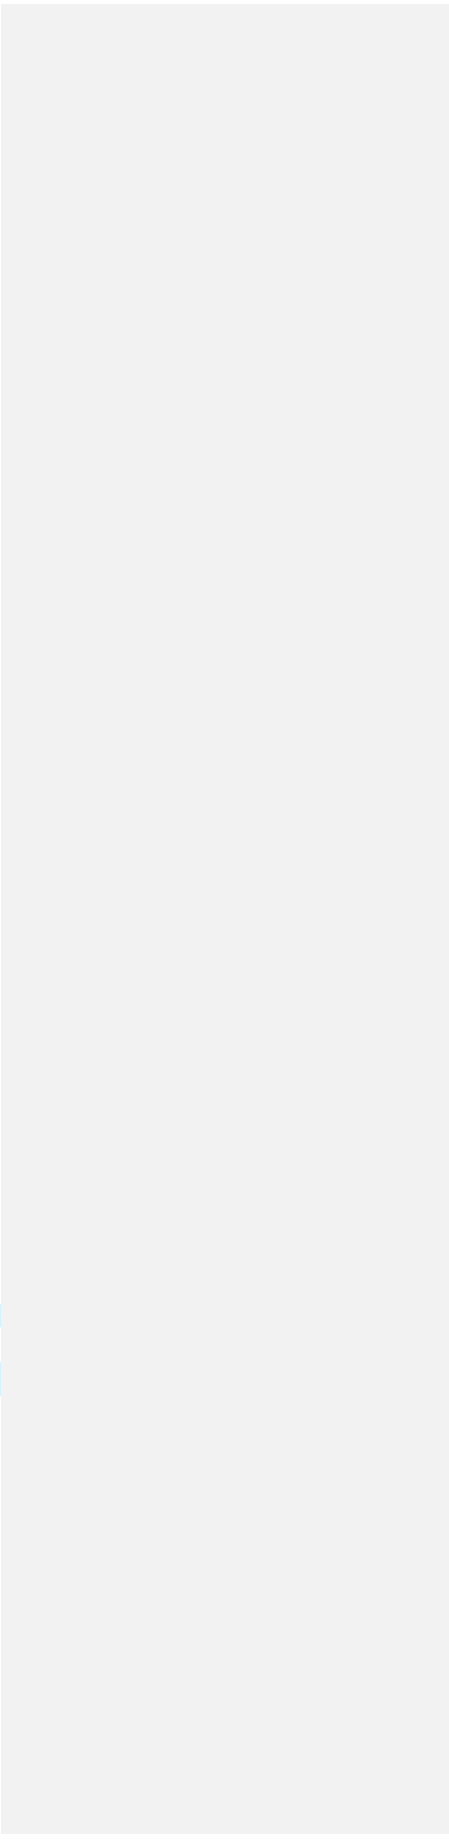

## References

1. Barker DJ. In utero programming of chronic disease. *Clin Sci* 1998;**95**:115-128.
2. Gluckman PD, Hanson MA, Buklijas T, et al. Epigenetic mechanisms that underpin metabolic and cardiovascular disease. *Nat Rev Endocrinol* 2009;**5**:401- 408. doi:10.1038/nrendo.2009.102
3. Relton C, Davey-Smith G, Ozanne S. Developmental Epigenetic Programming in Diabetes and Obesity. In: Jirtle R, Tyson E, eds. *Environmental Epigenomics in Health and Disease; Epigenetics and Complex Diseases*. Berlin Heidelberg: Springer 2013:235-253.
4. Breton CV, Byun HM, Wenten M, et al. Prenatal tobacco smoke exposure affects global and gene-specific DNA methylation. *Am J Respir Crit Care Med* 2009;**180**:462-467. Doi. 10.1164/rccm.200901-0135OC
5. Murphy SK, Adigun A, Huang Z, et al. Gender-specific methylation differences in relation to prenatal exposure to cigarette smoke. *Gene* 2012;**15**:36-43. doi.org/10.1016/j.gene.2011.11.062.
6. Joubert BR, Håberg SE, Nilsen RM, et al. 450K epigenome-wide scan identifies differential DNA methylation in newborns related to maternal smoking during pregnancy. *Environ Health Perspect* 2012;**120**:1425-1431. 10.1289/ehp.1205412.
7. Lee KKW, Pausova Z. Cigarette smoking and DNA methylation. *Front Genet* 2013;**4**:132. doi: 10.3389/fgene.2013.00132
8. Miller LL, Pembrey M, Davey Smith G, et al. Is the growth of the fetus of a non-smoking mother influenced by the smoking of either grandmother while pregnant? *PLoS ONE* 2014; [9\(2\): e86781. doi:10.1371/journal.pone.0086781](https://doi.org/10.1371/journal.pone.0086781) ~~in press~~.



- 1  
2  
3  
4  
5  
6  
7 | 9. Davey Smith G. Assessing intrauterine influences on offspring outcomes: Can  
8 epidemiological studies yield robust outcomes? *Basic Clin Pharmacol Toxicol* 2008;**102**:245-  
9 256. DOI: 10.1111/j.1742-7843.2007.00191.x  
10  
11  
12 | 10. Macdonald-Wallis C, Tobias JH, Davey Smith G, et al. Parental smoking during  
13 pregnancy and offspring bone mass at age 10 years: findings from a prospective birth cohort.  
14 *Osteoporos Int* 2011; **22**:1809-1819. Doi: 10.1007/s00198-010-1415-y  
15  
16  
17 | 11. Bygren LO, Kaati G, Edvinsson S. Longevity determined by ancestors' over nutrition  
18 during their slow growth period. *Acta Biotheor* 2001;**49**:53-59. Doi.  
19 10.1023/A:1010241825519  
20  
21  
22 | 12. Kaati G, Bygren LO, Edvinsson S. Cardiovascular and diabetes mortality determined by  
23 nutrition during parents' and grandparents' slow growth period. *Eur J Hum Genet*  
24 2002;**10**:682-688. DOI:10.1038/sj.ejhg.5200859  
25  
26  
27 | 13. Pembrey ME, Bygren LO, Kaati G et al. Sex-specific, male-line transgenerational  
28 responses in humans. *Eur J Hum Genet* 2006;**14**:159-166. doi:10.1038/sj.ejhg.5201538  
29  
30  
31 | 14. Anway MD, Cupp AS, Uzumcu M, et al. Epigenetic transgenerational actions of  
32 endocrine disruptors and male fertility. *Science* 2005;**308**:1466-1469. DOI:  
33 10.1126/science.1108190  
34  
35  
36 | 15. Franklin TB, Russig H, Weiss IC et al. Epigenetic transmission of the impact of early  
37 stress across generations. *Biol Psychiatr* 2010;**68**:408-  
38 415. doi10.1016/j.biopsych.2010.05.036  
39  
40  
41 | 16. Ng SF, Lin RC, Laybutt DR et al. Chronic high-fat diet in fathers programs  $\beta$ -cell  
42 dysfunction in female rat offspring. *Nature* 2010;**467**:963-966. doi:10.1038/nature09491  
43  
44  
45 | 17. Zeybel M, Hardy T, Wong YK, et al. Multigenerational epigenetic adaptation of the  
46 hepatic wound-healing response. *Nat Med* 2012;**18**:1369-1377. doi:10.1038/nm.2893  
47  
48  
49  
50  
51  
52  
53  
54  
55  
56  
57  
58  
59  
60

- 1  
2  
3  
4  
5  
6  
7 | 18. Dunn GA, Bale TL. Maternal high-fat diet effects on third-generation female body size  
8 via the paternal lineage. *Endocrinol* 2011;**152**:2228-2236. Doi:10.1210/en.2010.1461  
9
- 10 | 19. Burdge GC, Slater-Jefferies J, Torrens C, et al. Dietary protein restriction of pregnant rats  
11 in the F0 generation induces altered methylation of hepatic gene promoters in the adult male  
12 offspring in the F1 and F2 generations. *Br J Nutr* 2007;**97**:435-439. Doi  
13 10.1017/S0007114507352392  
14
- 15 | 20. Carone BR, Fauquier L, Habib N, et al. Paternally induced transgenerational  
16 environmental reprogramming of metabolic gene expression in mammals. *Cell*  
17 2010;**143**:1084-1096. Doi:10.1016/j.cell.2010.12.008  
18
- 19 | 21. Dias BG, Ressler KJ. Parental olfactory experience influences behavior and neural  
20 structure in subsequent generations. *Nat Neurosci* 2014;**17**:89-96. Doi: doi:10.1038/nn.3594  
21
- 22 | 22. Daxinger L, Whitelaw E. Understanding transgenerational epigenetic inheritance via the  
23 gametes in mammals. *Nat Rev Genet* 2012;**31**:153-162. doi:10.1038/nrg3188  
24
- 25 | 23. Misra DP, Astone N, Lynch CD. Maternal smoking and birth weight: interaction with  
26 parity and mother's own in utero exposure to smoking. *Epidemiol* 2005;**16**:288-293. doi:  
27 10.1097/01.ede.0000158198.59544.cf  
28
- 29 | 24. Golding J, Pembrey M, Jones R. ALSPAC—the Avon Longitudinal Study of Parents and  
30 Children. I. Study methodology. *Paediatr Perinatal Epidemiol* 2001;**15**:74-87. DOI:  
31 10.1046/j.1365-3016.2001.00325.x  
32
- 33 | 25. Boyd A, Golding J, Macleod J, et al. Cohort Profile: The 'Children of the 90s'—the index  
34 offspring of the Avon Longitudinal Study of Parents and Children. *Int J Epidemiol*  
35 2012;**42**:111-127. doi. 10.1093/ije/dys064  
36
- 37 | 26. ALSPAC web: [http://www.bristol.ac.uk/alspac/researchers/resources-available/data-  
39 details/questionnaires/](http://www.bristol.ac.uk/alspac/researchers/resources-available/data-<br/>38 details/questionnaires/). Accessed 2 December 2013.  
40  
41  
42  
43  
44  
45  
46  
47  
48  
49  
50  
51  
52  
53  
54  
55  
56  
57  
58  
59  
60

- 1  
2  
3  
4  
5  
6  
7 | 27. Cole TJ, Henson GL, Tremble JM, et al. Birthweight for length: ponderal index, body  
8 mass index or Benn index? *Ann Hum Biol* 1997;**24**:289–298.  
9  
10 | doi:10.1080/03014469700005032  
11  
12 | 28. Gale CR, O'Callaghan FJ, Bredow M, et al. The influence of head growth in fetal life,  
13 infancy, and childhood on intelligence at the ages of 4 and 8 years. *Pediatr* 2006;**118**:1486-  
14 1492. doi: 10.1542/peds.2005-2629  
15  
16 | 29. Wechsler D, Golombok S, Rust J. WISC-IIIUK Wechsler Intelligence Scale for Children.  
17 Sidcup, UK: Psychological Corp 1992.  
18  
19 | 30. Gunnell D, Miller LL, Rogers I, et al. Association of Insulin-like Growth Factor I and  
20 Insulin-like Growth Factor–Binding Protein-3 With Intelligence Quotient Among 8-to 9-  
21 Year-Old Children in the Avon Longitudinal Study of Parents and Children. *Pediatr* 2005;  
22 **116**:e681-e686. doi: 10.1542/peds.2004-2390  
23  
24 | 31. Dickens WT, Flynn JR. Heritability estimates versus large environmental effects: the IQ  
25 paradox resolved. *Psychol Rev* 2001;**108**:346. Doi:10.1037/0033-295X.108.2.346  
26  
27 | 32. Klebanoff MA, Levine RJ, Clemens JD, et al. Serum cotinine concentration and self-  
28 reported smoking during pregnancy. *Am J Epidemiol* 1998;**148**:259-262.  
29  
30 | 33. Grossniklaus U, Kelly B, Ferguson-Smith AC, et al. Transgenerational epigenetic  
31 inheritance: how important is it? *Nat Rev Genet* 2013;**14**:228-235. doi:10.1038/nrg3435  
32  
33 | 34. LeRoith D, Lowe WL. Growth factors. In: Melmed S, Conn PM, eds. *Endocrinology:*  
34 *Basic and Clinical Principles*, 2<sup>nd</sup> edition. Totowa, New Jersey: Humana Press 2005:85-91.  
35  
36 | 35. Demetriou C, Abu-Amero S, Thomas AC, et al. Paternally expressed, imprinted Insulin-  
37 1 like growth factor-2 in chorionic villi correlates significantly with birth weight. *PLoS ONE*  
38 2014;doi:10.1371/journal.pone.0085454.  
39  
40  
41  
42  
43  
44  
45  
46  
47  
48  
49  
50  
51  
52  
53  
54  
55  
56  
57  
58  
59  
60

- 1  
2  
3  
4  
5  
6  
7 | 36. Seisenberger S, Peat JR, Hore TA, et al. Reprogramming DNA methylation in the  
8 mammalian life cycle: building and breaking epigenetic barriers. *Philos Trans R Soc Lond B*  
9 *Biol Sci* 2013;**368**: 20110330. doi: 10.1098/rstb.2011.0330.  
10  
11 | 37. Soubry A, Schildkraut JM, Murtha A, et al. Paternal obesity is associated with IGF2  
12 hypomethylation in newborns: results from a Newborn Epigenetics Study (NEST) cohort.  
13 *BMC Med* 2013;29:doi:10.1186/1741-7015-11-29  
14  
15  
16  
17  
18  
19  
20  
21  
22  
23  
24  
25  
26  
27  
28  
29  
30  
31  
32  
33  
34  
35  
36  
37  
38  
39  
40  
41  
42  
43  
44  
45  
46  
47  
48  
49  
50  
51  
52  
53  
54  
55  
56  
57  
58  
59  
60

1  
2  
3  
4  
5  
6  
7  
8  
9  
10  
11  
12  
13  
14  
15  
16  
17  
18  
19  
20  
21  
22  
23  
24  
25  
26  
27  
28  
29  
30  
31  
32  
33  
34  
35  
36  
37  
38  
39  
40  
41  
42  
43  
44  
45  
46  
47  
48  
49  
50  
51  
52  
53  
54  
55  
56  
57  
58  
59  
60

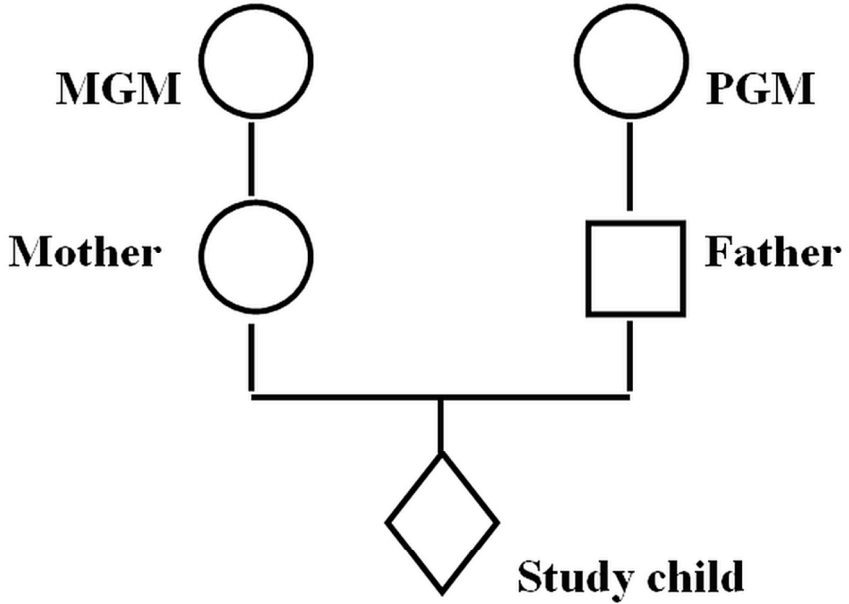

90x62mm (300 x 300 DPI)

view only

Supplementary Table 1. Mean difference (<sup>P</sup> value) [95% CI] in birth measurements of children born to smoking mothers, comparing those where the child's grandmother had smoked with those who had not when the child is the mother's firstborn

|                                     | <u>MGM+ M+ v. MGM- M+</u> |                        | <u>PGM+ M+ v. PGM- M+</u> |                              |
|-------------------------------------|---------------------------|------------------------|---------------------------|------------------------------|
|                                     | Unadjusted                | Adjusted <sup>a</sup>  | Unadjusted                | Adjusted <sup>a</sup>        |
| <b>BIRTHWEIGHT (g)</b>              |                           |                        |                           |                              |
| Boy                                 | -21 <sup>(0.64)</sup>     | +5 <sup>(0.90)</sup>   | -66 <sup>(0.22)</sup>     | -51 <sup>(0.22)</sup>        |
|                                     | [-109, +67]               | [-71, +80]             | [-172, +40]               | [-134, +31]                  |
| Girl                                | -79 <sup>(0.057)</sup>    | -15 <sup>(0.69)</sup>  | -86 <sup>(0.077)</sup>    | -17 <sup>(0.69)</sup>        |
|                                     | [-160, +2]                | [-92, +61]             | [-181, +9]                | [-101, +67]                  |
| <b>BIRTH LENGTH (cm x100)</b>       |                           |                        |                           |                              |
| Boy                                 | +12 <sup>(0.58)</sup>     | +22 <sup>(0.27)</sup>  | -31 <sup>(0.22)</sup>     | -33 <sup>(0.12)</sup>        |
|                                     | [-29, +52]                | [-17, +61]             | [-82, +19]                | [-75, +09]                   |
| Girl                                | -26 <sup>(0.21)</sup>     | +12 <sup>(0.58)</sup>  | -34 <sup>(0.17)</sup>     | -9 <sup>(0.71)</sup>         |
|                                     | [-66, +14]                | [-31, +54]             | [-84, +15]                | [-57, +39]                   |
| <b>HEAD CIRCUMFERENCE (cm x100)</b> |                           |                        |                           |                              |
| Boy                                 | +6 <sup>(0.69)</sup>      | +7 <sup>(0.62)</sup>   | -37 <sup>(0.051)</sup>    | <b>-34<sup>(0.036)</sup></b> |
|                                     | [-23, +34]                | [-21, +35]             | [-74, +00]                | <b>[-66, -2]</b>             |
| Girl                                | -23 <sup>(0.068)</sup>    | +1 <sup>(0.94)</sup>   | -12 <sup>(0.46)</sup>     | +6 <sup>(0.69)</sup>         |
|                                     | [-48, +2]                 | [-25, +27]             | [-43, +20]                | [-23, +35]                   |
| <b>BMI ((kg/m<sup>2</sup>)x10)</b>  |                           |                        |                           |                              |
| Boy                                 | -0.6 <sup>(0.59)</sup>    | -0.1 <sup>(0.92)</sup> | -0.6 <sup>(0.65)</sup>    | -1.1 <sup>(0.37)</sup>       |
|                                     | [-2.8, +1.6]              | [-2.3, +2.1]           | [-3.2, +2.0]              | [-3.5, +1.3]                 |
| Girl                                | -2.6 <sup>(0.061)</sup>   | -0.7 <sup>(0.64)</sup> | -2.6 <sup>(0.13)</sup>    | -1.6 <sup>(0.35)</sup>       |
|                                     | [-5.2, +0.1]              | [-3.6, +2.2]           | [-6.0, +0.8]              | [-5.0, +1.8]                 |

<sup>a</sup>Adjusted for maternal education, partner smoked in pregnancy, gestation of study child and the amount the mother smoked

[N.B. the data for birth length and head circumference are given in cm x 100 so as to aid viewing]

Supplementary Table 2. Mean difference (<sup>P</sup> value) [95% CI] in birth measurements of children born to smoking mothers, comparing those where the child's grandmother had smoked with those who had not when the child is NOT the mother's firstborn

|                                     | <u>MGM+ M+ v. MGM- M+</u> |                        | <u>PGM+ M+ v. PGM- M+</u>     |                              |
|-------------------------------------|---------------------------|------------------------|-------------------------------|------------------------------|
|                                     | Unadjusted                | Adjusted <sup>a</sup>  | Unadjusted                    | Adjusted <sup>a</sup>        |
| <b>BIRTHWEIGHT (g)</b>              |                           |                        |                               |                              |
| Boy                                 | -16 <sup>(0.67)</sup>     | -52 <sup>(0.099)</sup> | -84 <sup>(0.061)</sup>        | -51 <sup>(0.17)</sup>        |
|                                     | [-88, +57]                | [-115, +10]            | [-172, +4]                    | [-125, +22]                  |
| Girl                                | -54 <sup>(0.15)</sup>     | +41 <sup>(0.22)</sup>  | <b>-106<sup>(0.027)</sup></b> | -1 <sup>(0.98)</sup>         |
|                                     | [-127, +19]               | [-108, +25]            | <b>[-199, -12]</b>            | [-77, +75]                   |
| <b>BIRTH LENGTH (cm x100)</b>       |                           |                        |                               |                              |
| Boy                                 | +1 <sup>(0.96)</sup>      | -15 <sup>(0.44)</sup>  | <b>-52<sup>(0.033)</sup></b>  | -26 <sup>(0.27)</sup>        |
|                                     | [-38, +40]                | [-5, +24]              | <b>[-101, -4]</b>             | [-73, +21]                   |
| Girl                                | +1 <sup>(0.97)</sup>      | +4 <sup>(0.82)</sup>   | -5 <sup>(0.074)</sup>         | +14 <sup>(0.53)</sup>        |
|                                     | [-39, +40]                | [-32, +41]             | [-95, +4]                     | [-30, +57]                   |
| <b>HEAD CIRCUMFERENCE (cm x100)</b> |                           |                        |                               |                              |
| Boy                                 | +4 <sup>(0.74)</sup>      | -9 <sup>(0.47)</sup>   | <b>-38<sup>(0.016)</sup></b>  | <b>-35<sup>(0.017)</sup></b> |
|                                     | [-21, +30]                | [-35, +16]             | <b>[-69, -7]</b>              | <b>[-64, -6]</b>             |
| Girl                                | -0 <sup>(0.98)</sup>      | -2 <sup>(0.86)</sup>   | -23 <sup>(0.12)</sup>         | +11 <sup>(0.39)</sup>        |
|                                     | [-24, +23]                | [-23, +19]             | [-53, +6]                     | [-15, +37]                   |
| <b>BMI ((kg/m<sup>2</sup>)x10)</b>  |                           |                        |                               |                              |
| Boy                                 | -0.9 <sup>(0.45)</sup>    | -1.2 <sup>(0.34)</sup> | -2.3 <sup>(0.11)</sup>        | -1.1 <sup>(0.46)</sup>       |
|                                     | [-3.2, +1.4]              | [-0.37, +1.3]          | [-5.2, +0.5]                  | [-4.0, +1.8]                 |
| Girl                                | -1.1 <sup>(0.32)</sup>    | -1.4 <sup>(0.21)</sup> | -2.1 <sup>(0.12)</sup>        | +0.5 <sup>(0.87)</sup>       |
|                                     | [-3.4, +1.1]              | [-3.7, +0.8]           | [-4.8, +0.5]                  | [-2.0, +3.0]                 |

<sup>a</sup>Adjusted for maternal education, partner smoked in pregnancy, gestation of study child and the amount the mother smoked

[N.B. the data for birth length and head circumference are given in cm x 100 so as to aid viewing]

## STROBE Statement—checklist of items that should be included in reports of observational studies

|                              | Item No | Recommendation                                                                                                                                                                                                                                                                                                                                                                                                                                                                                                                                                                                                                                                                                   |
|------------------------------|---------|--------------------------------------------------------------------------------------------------------------------------------------------------------------------------------------------------------------------------------------------------------------------------------------------------------------------------------------------------------------------------------------------------------------------------------------------------------------------------------------------------------------------------------------------------------------------------------------------------------------------------------------------------------------------------------------------------|
| <b>Title and abstract</b>    | 1       | (a) Indicate the study's design with a commonly used term in the title or the abstract<br>(b) Provide in the abstract an informative and balanced summary of what was done and what was found                                                                                                                                                                                                                                                                                                                                                                                                                                                                                                    |
| <b>Introduction</b>          |         |                                                                                                                                                                                                                                                                                                                                                                                                                                                                                                                                                                                                                                                                                                  |
| Background/rationale         | 2       | Explain the scientific background and rationale for the investigation being reported                                                                                                                                                                                                                                                                                                                                                                                                                                                                                                                                                                                                             |
| Objectives                   | 3       | State specific objectives, including any prespecified hypotheses                                                                                                                                                                                                                                                                                                                                                                                                                                                                                                                                                                                                                                 |
| <b>Methods</b>               |         |                                                                                                                                                                                                                                                                                                                                                                                                                                                                                                                                                                                                                                                                                                  |
| Study design                 | 4       | Present key elements of study design early in the paper                                                                                                                                                                                                                                                                                                                                                                                                                                                                                                                                                                                                                                          |
| Setting                      | 5       | Describe the setting, locations, and relevant dates, including periods of recruitment, exposure, follow-up, and data collection                                                                                                                                                                                                                                                                                                                                                                                                                                                                                                                                                                  |
| Participants                 | 6       | (a) <i>Cohort study</i> —Give the eligibility criteria, and the sources and methods of selection of participants. Describe methods of follow-up<br><i>Case-control study</i> —Give the eligibility criteria, and the sources and methods of case ascertainment and control selection. Give the rationale for the choice of cases and controls<br><i>Cross-sectional study</i> —Give the eligibility criteria, and the sources and methods of selection of participants<br>(b) <i>Cohort study</i> —For matched studies, give matching criteria and number of exposed and unexposed<br><i>Case-control study</i> —For matched studies, give matching criteria and the number of controls per case |
| Variables                    | 7       | Clearly define all outcomes, exposures, predictors, potential confounders, and effect modifiers. Give diagnostic criteria, if applicable                                                                                                                                                                                                                                                                                                                                                                                                                                                                                                                                                         |
| Data sources/<br>measurement | 8*      | For each variable of interest, give sources of data and details of methods of assessment (measurement). Describe comparability of assessment methods if there is more than one group                                                                                                                                                                                                                                                                                                                                                                                                                                                                                                             |
| Bias                         | 9       | Describe any efforts to address potential sources of bias                                                                                                                                                                                                                                                                                                                                                                                                                                                                                                                                                                                                                                        |
| Study size                   | 10      | Explain how the study size was arrived at                                                                                                                                                                                                                                                                                                                                                                                                                                                                                                                                                                                                                                                        |
| Quantitative variables       | 11      | Explain how quantitative variables were handled in the analyses. If applicable, describe which groupings were chosen and why                                                                                                                                                                                                                                                                                                                                                                                                                                                                                                                                                                     |
| Statistical methods          | 12      | (a) Describe all statistical methods, including those used to control for confounding<br>(b) Describe any methods used to examine subgroups and interactions<br>(c) Explain how missing data were addressed<br>(d) <i>Cohort study</i> —If applicable, explain how loss to follow-up was addressed<br><i>Case-control study</i> —If applicable, explain how matching of cases and controls was addressed<br><i>Cross-sectional study</i> —If applicable, describe analytical methods taking account of sampling strategy<br>(e) Describe any sensitivity analyses                                                                                                                                |

Continued on next page



**Results**

|                  |     |                                                                                                                                                                                                                                                                                                                                                                                                               |
|------------------|-----|---------------------------------------------------------------------------------------------------------------------------------------------------------------------------------------------------------------------------------------------------------------------------------------------------------------------------------------------------------------------------------------------------------------|
| Participants     | 13* | (a) Report numbers of individuals at each stage of study—eg numbers potentially eligible, examined for eligibility, confirmed eligible, included in the study, completing follow-up, and analysed<br>(b) Give reasons for non-participation at each stage<br>(c) Consider use of a flow diagram                                                                                                               |
| Descriptive data | 14* | (a) Give characteristics of study participants (eg demographic, clinical, social) and information on exposures and potential confounders<br>(b) Indicate number of participants with missing data for each variable of interest<br>(c) <i>Cohort study</i> —Summarise follow-up time (eg, average and total amount)                                                                                           |
| Outcome data     | 15* | <i>Cohort study</i> —Report numbers of outcome events or summary measures over time<br><i>Case-control study</i> —Report numbers in each exposure category, or summary measures of exposure<br><i>Cross-sectional study</i> —Report numbers of outcome events or summary measures                                                                                                                             |
| Main results     | 16  | (a) Give unadjusted estimates and, if applicable, confounder-adjusted estimates and their precision (eg, 95% confidence interval). Make clear which confounders were adjusted for and why they were included<br>(b) Report category boundaries when continuous variables were categorized<br>(c) If relevant, consider translating estimates of relative risk into absolute risk for a meaningful time period |
| Other analyses   | 17  | Report other analyses done—eg analyses of subgroups and interactions, and sensitivity analyses                                                                                                                                                                                                                                                                                                                |

**Discussion**

|                  |    |                                                                                                                                                                            |
|------------------|----|----------------------------------------------------------------------------------------------------------------------------------------------------------------------------|
| Key results      | 18 | Summarise key results with reference to study objectives                                                                                                                   |
| Limitations      | 19 | Discuss limitations of the study, taking into account sources of potential bias or imprecision. Discuss both direction and magnitude of any potential bias                 |
| Interpretation   | 20 | Give a cautious overall interpretation of results considering objectives, limitations, multiplicity of analyses, results from similar studies, and other relevant evidence |
| Generalisability | 21 | Discuss the generalisability (external validity) of the study results                                                                                                      |

**Other information**

|         |    |                                                                                                                                                               |
|---------|----|---------------------------------------------------------------------------------------------------------------------------------------------------------------|
| Funding | 22 | Give the source of funding and the role of the funders for the present study and, if applicable, for the original study on which the present article is based |
|---------|----|---------------------------------------------------------------------------------------------------------------------------------------------------------------|

\*Give information separately for cases and controls in case-control studies and, if applicable, for exposed and unexposed groups in cohort and cross-sectional studies.

**Note:** An Explanation and Elaboration article discusses each checklist item and gives methodological background and published examples of transparent reporting. The STROBE checklist is best used in conjunction with this article (freely available on the Web sites of PLoS Medicine at <http://www.plosmedicine.org/>, Annals of Internal Medicine at <http://www.annals.org/>, and Epidemiology at <http://www.epidem.com/>). Information on the STROBE Initiative is available at [www.strobe-statement.org](http://www.strobe-statement.org).
